# Supplementary material for: Stereoselective synthesis of gem-dihalopiperidines via the halo-aza-Prins cyclization reaction: access to piperidin-4-ones and pyridines
Source: Royal Society of Chemistry journal article supplement (doi:10.1039/d4ob00338a), 2024-01-01

## Supporting Information for Review only

### Stereoselective Synthesis of *gem*-Dihalopiperidines via Halo-Aza-Prins

### Cyclization Reaction: Access to Piperidin-4-ones and Pyridines

Surjya Kumar Bora, Subhamoy Biswas, Bipin Kumar Behera, and Anil K. Saikia\*

Department of Chemistry, Indian Institute of Technology Guwahati, Guwahati 781039, Assam,

India, e-mail: [asaikia@iitg.ac.in](mailto:asaikia@iitg.ac.in)

#### Table of Contents:

|                                      |        |
|--------------------------------------|--------|
| 1. HRMS spectra of all new compounds | S2-S44 |
|--------------------------------------|--------|

# HRMS spectrum of **1c**

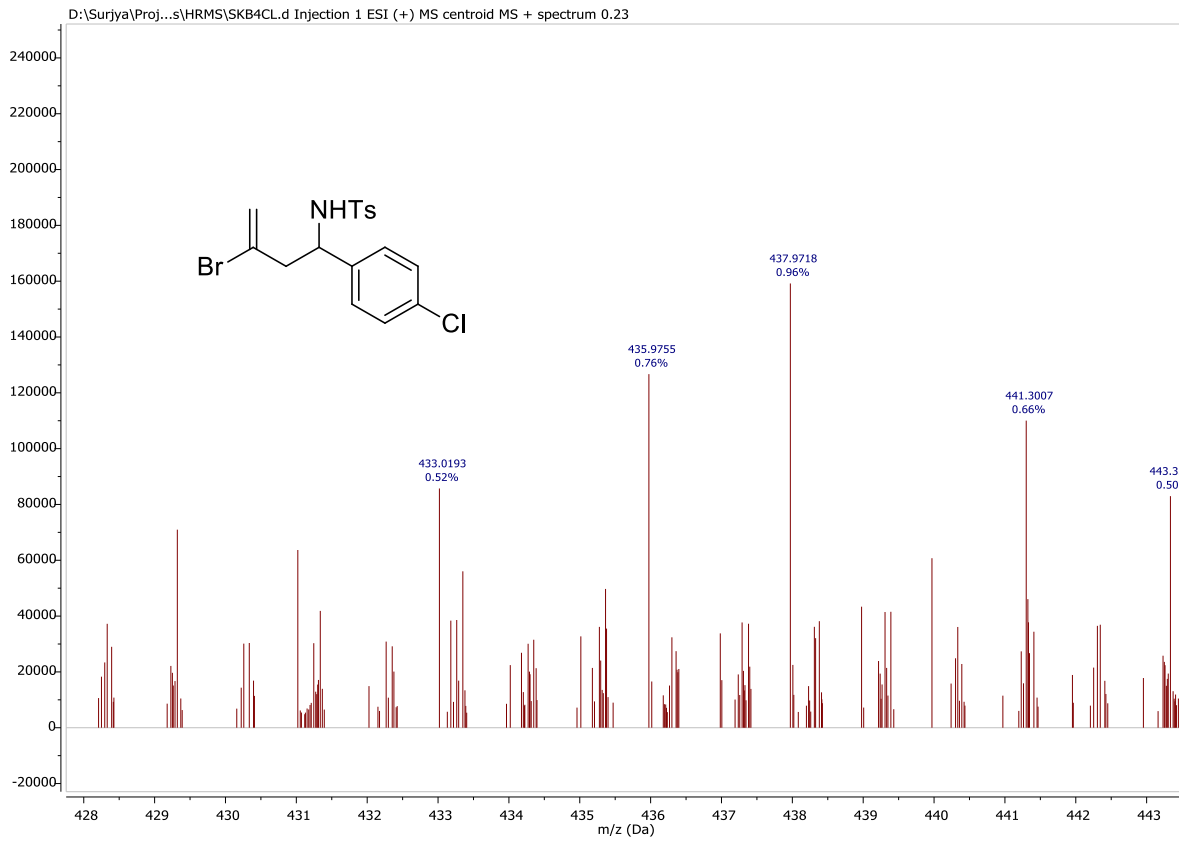

# HRMS spectrum of **1d**

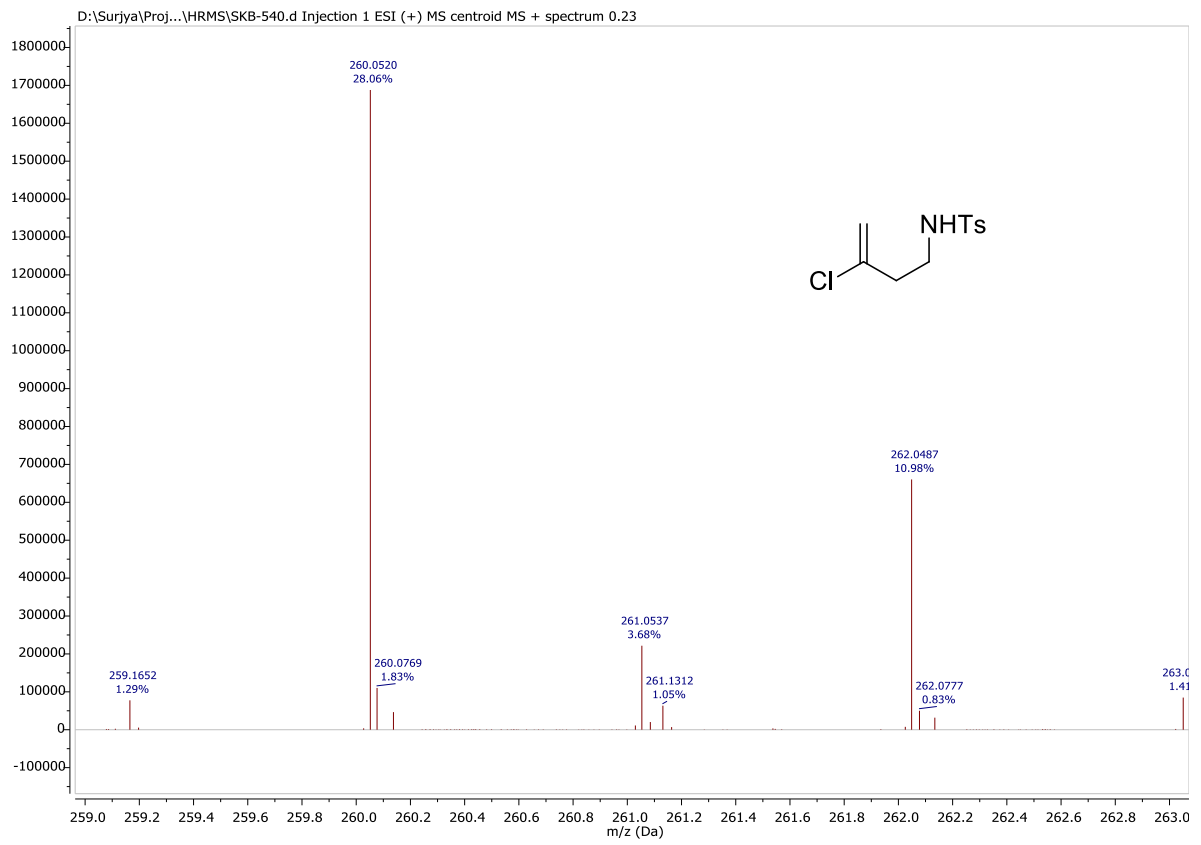

# HRMS spectrum of 3aa

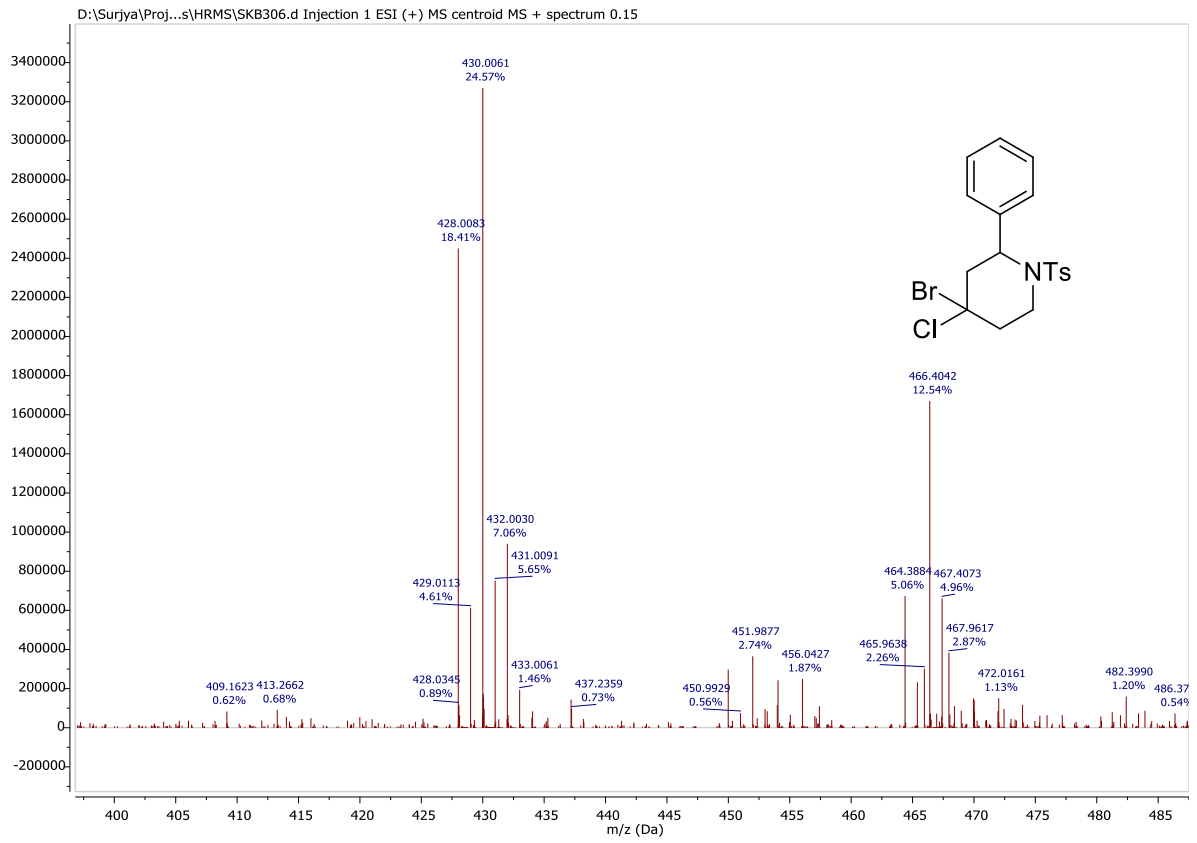

# HRMS spectrum of **3ab**

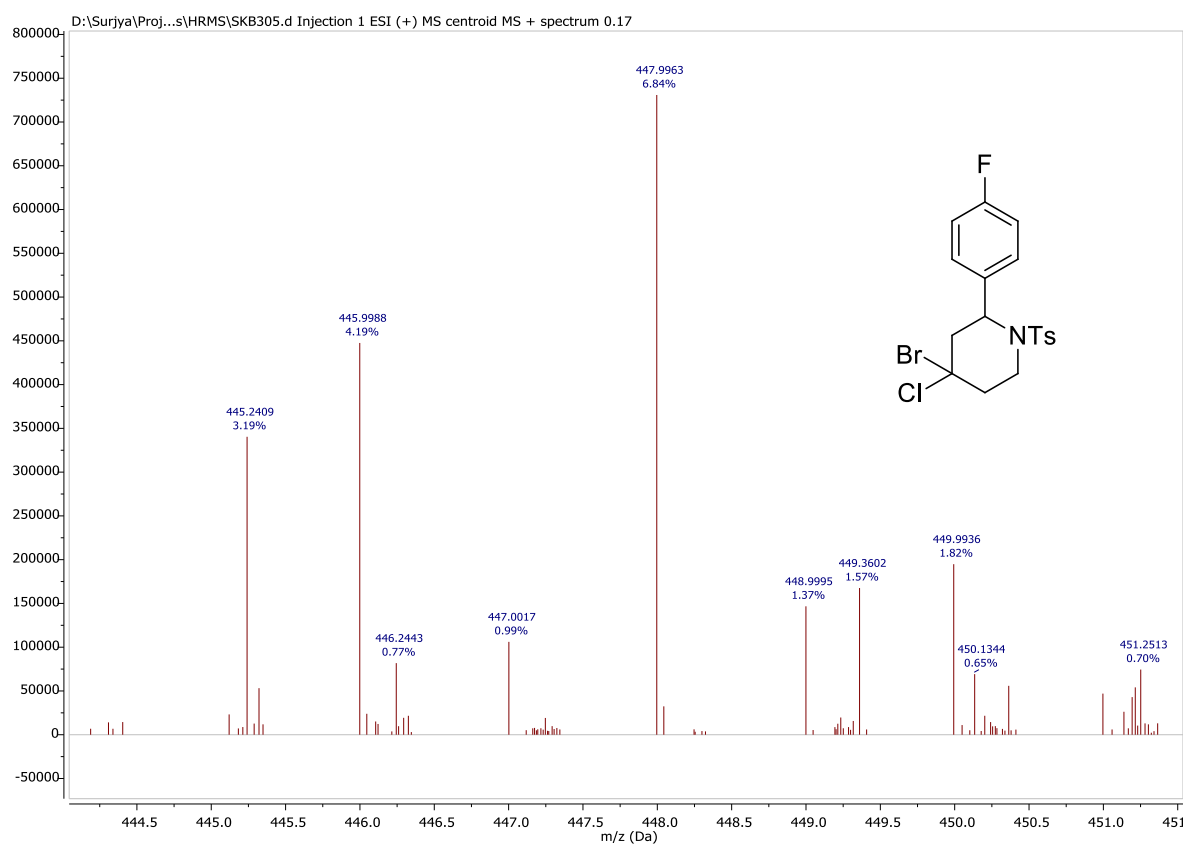

# HRMS spectrum of **3ac**

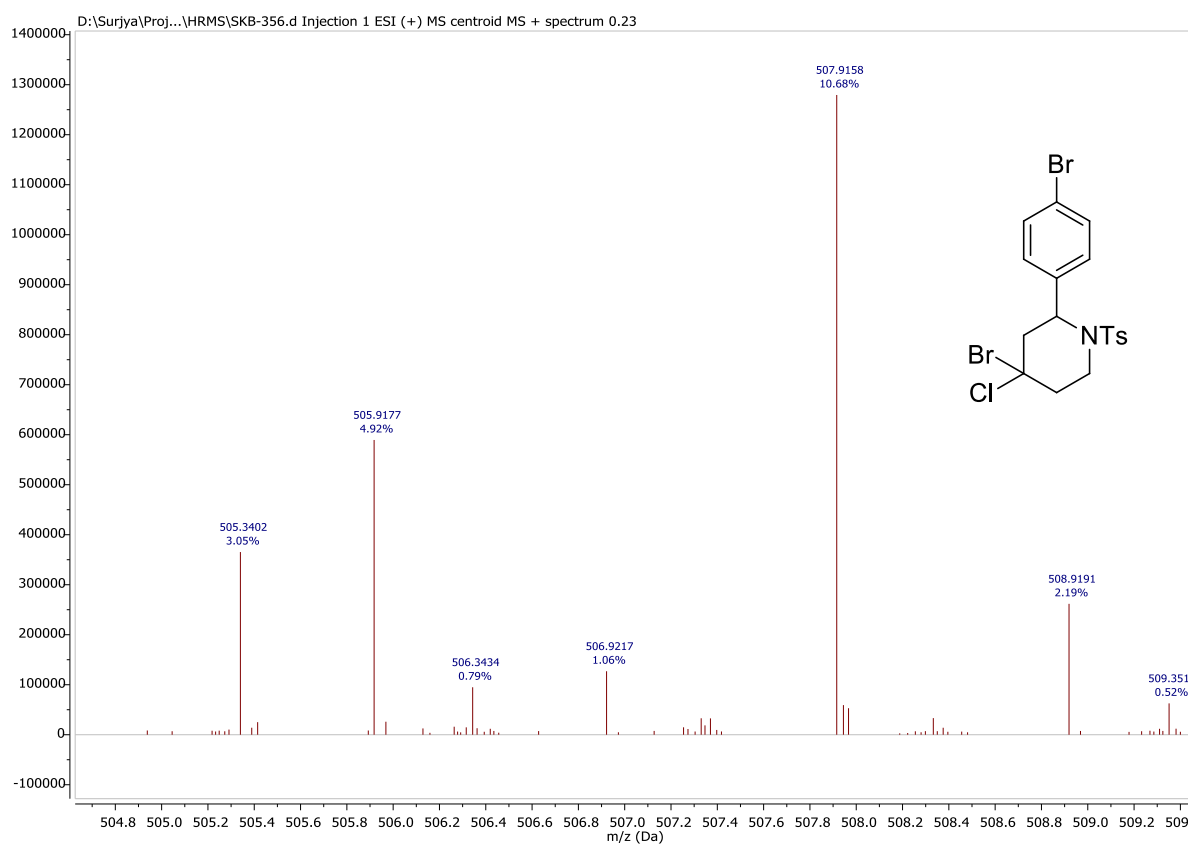

# HRMS spectrum of **3ad**

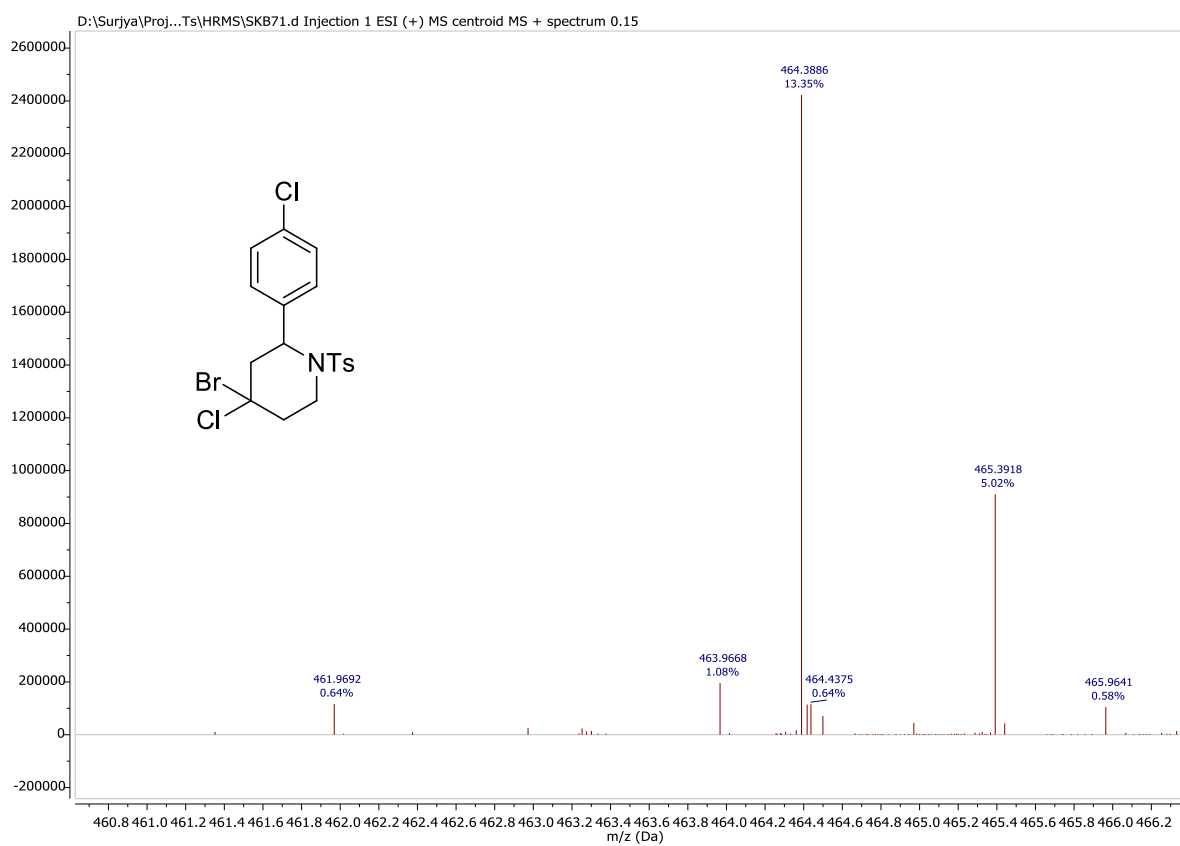

# HRMS spectrum of 3ae

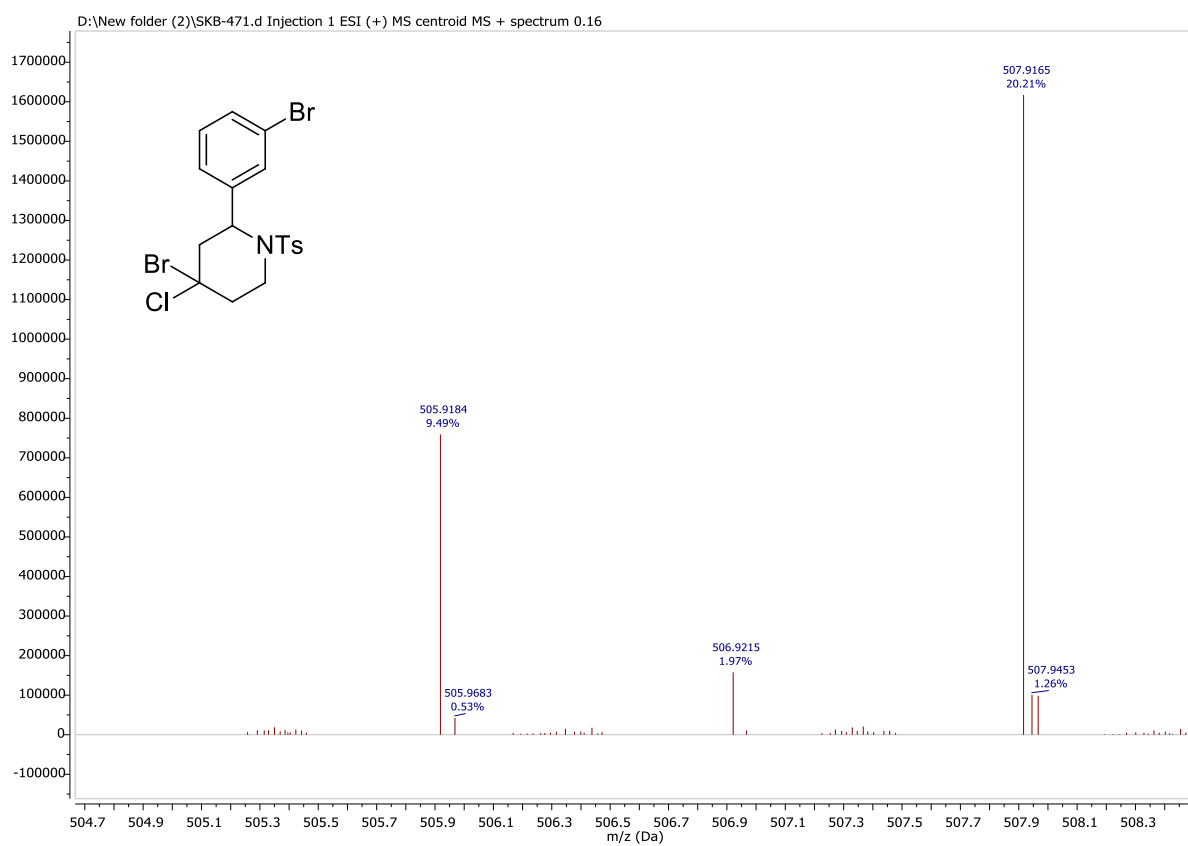



# HRMS spectrum of 3af

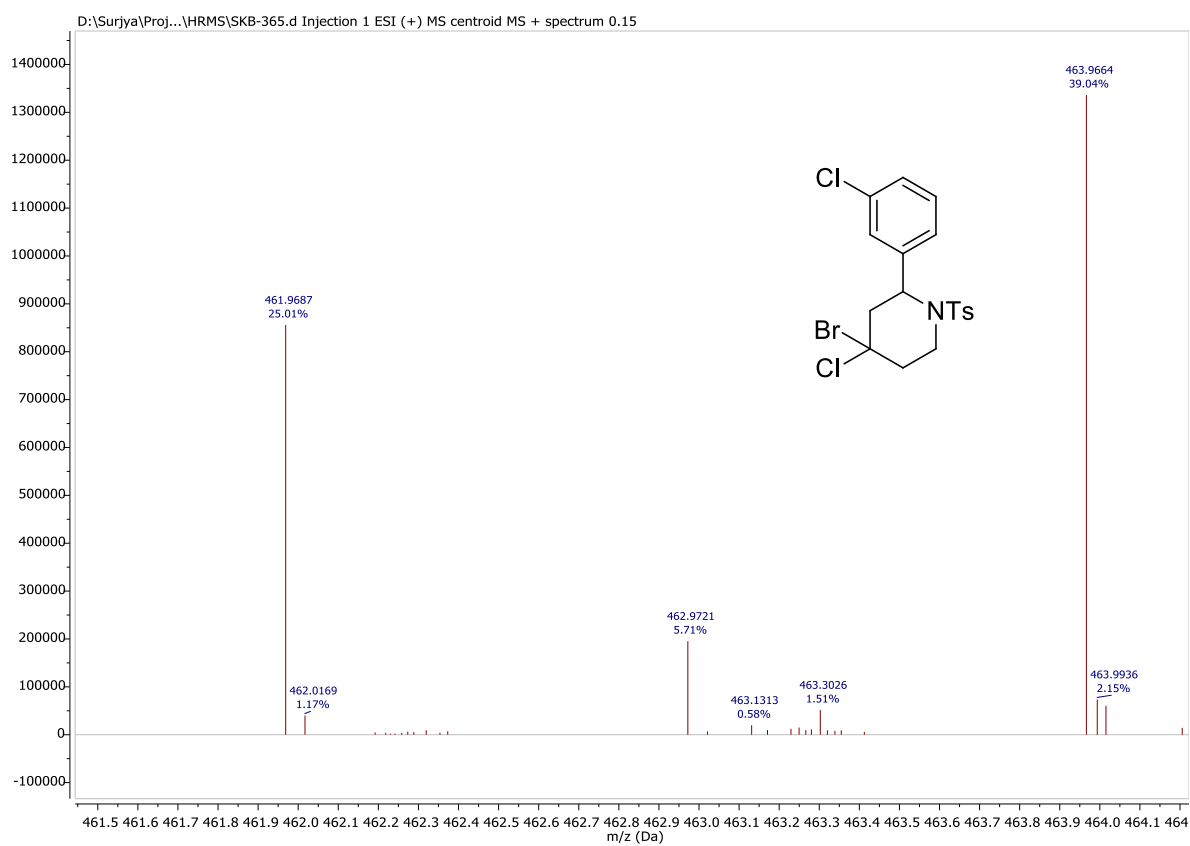

# HRMS spectrum of **3ag**

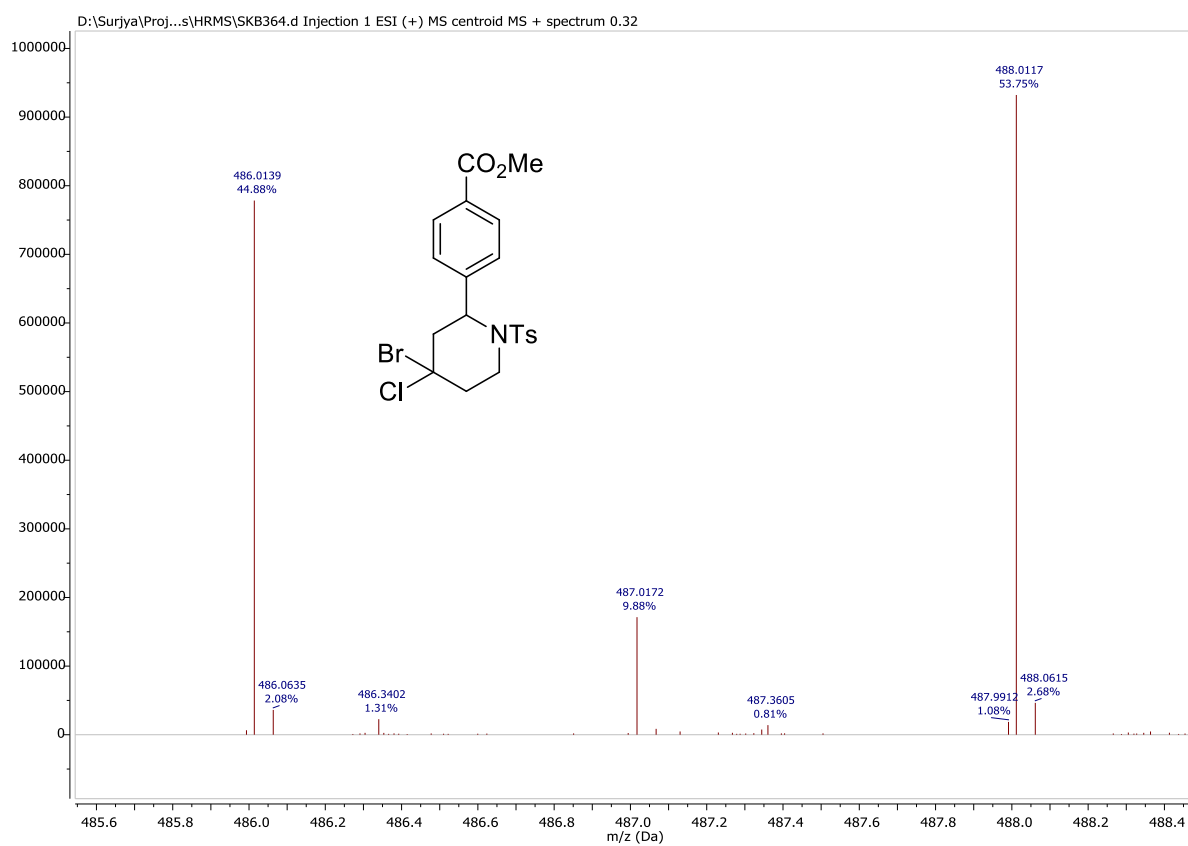

# HRMS spectrum of **3ah**

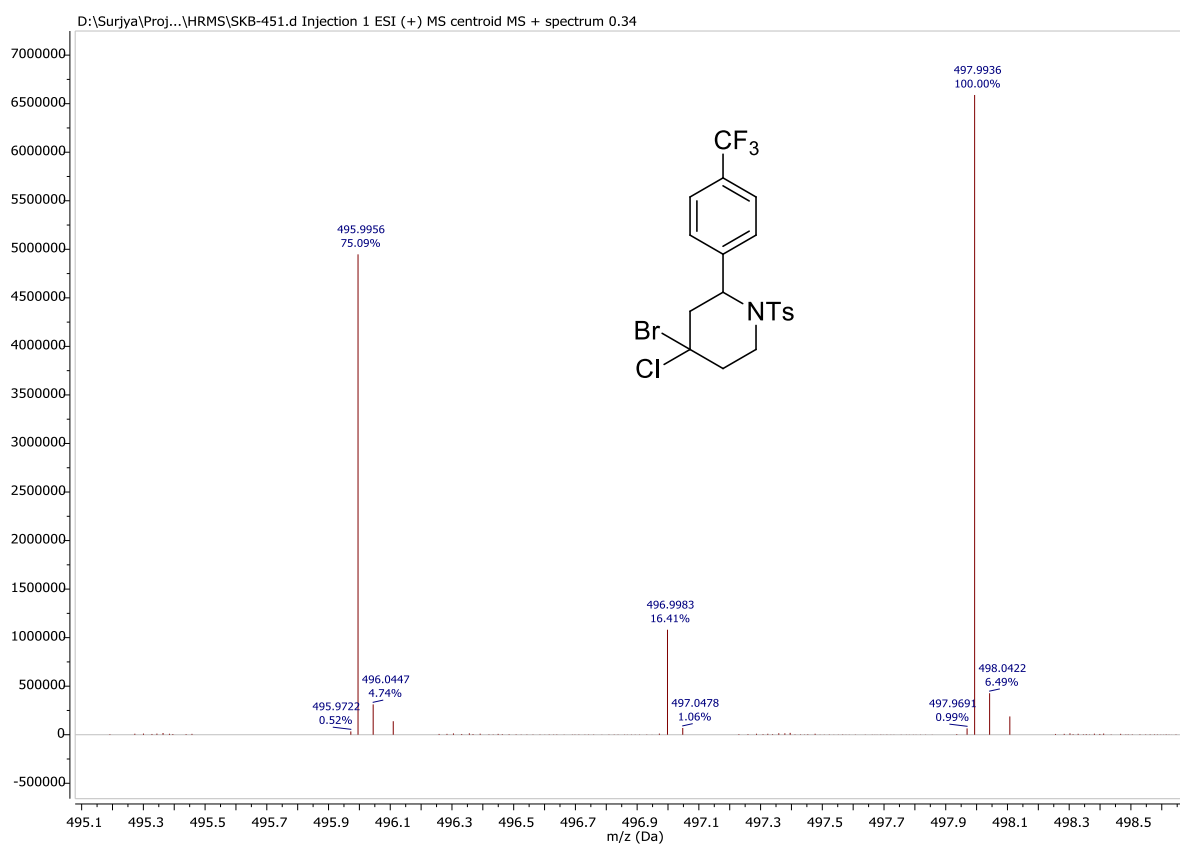

# HRMS spectrum of 3ai

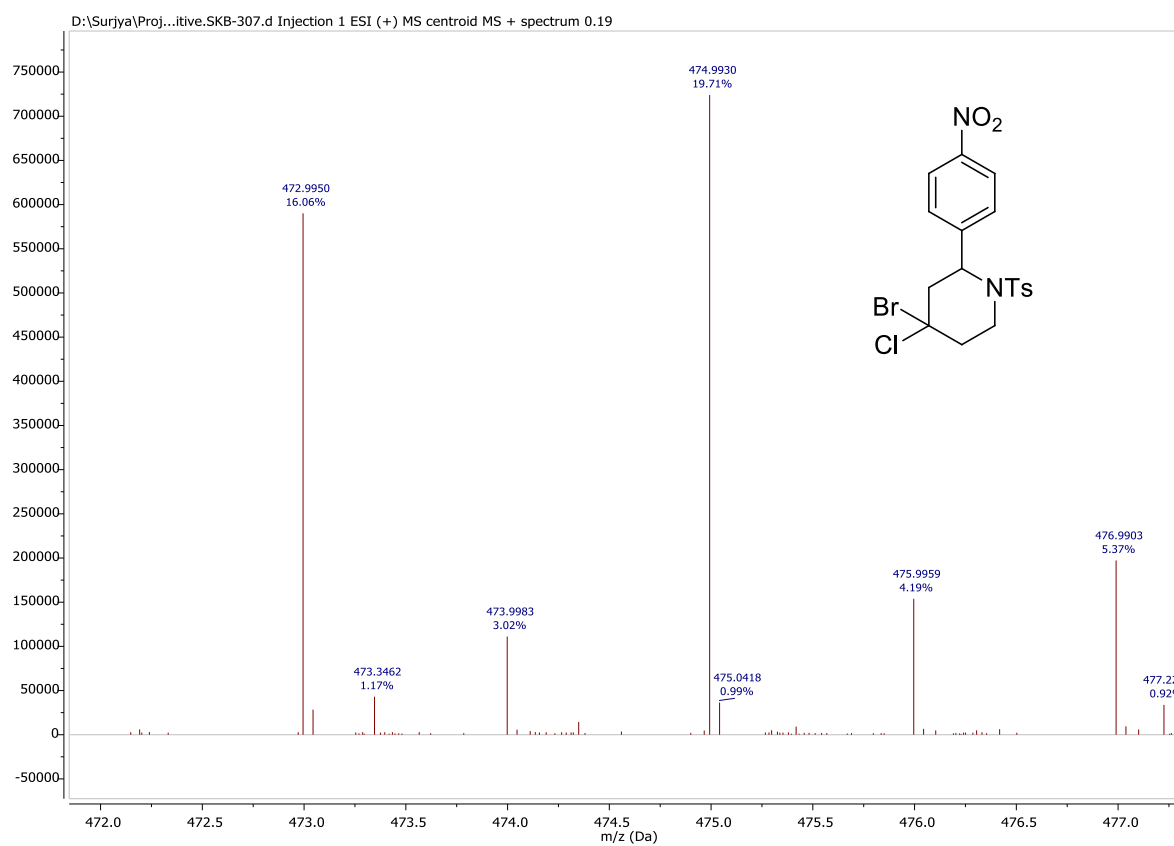

# HRMS spectrum of 3aj

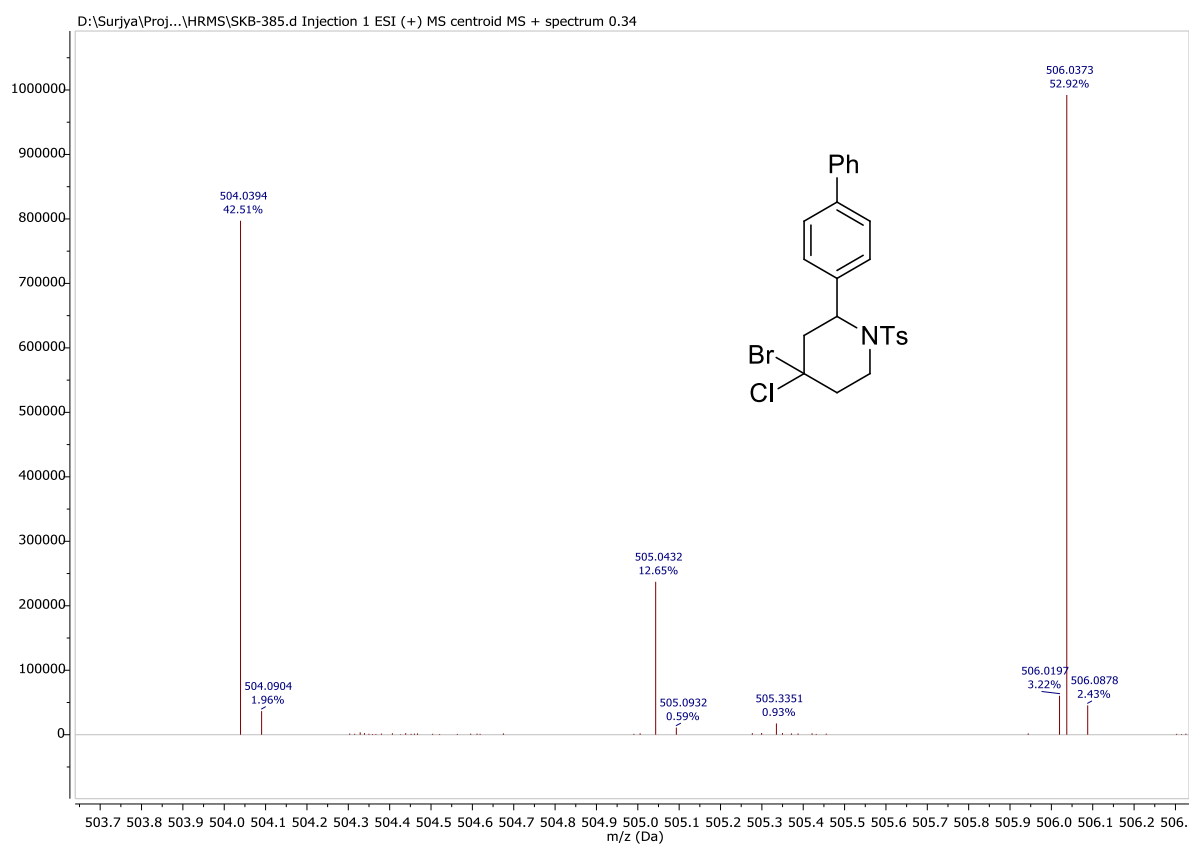

# HRMS spectrum of **3ak**

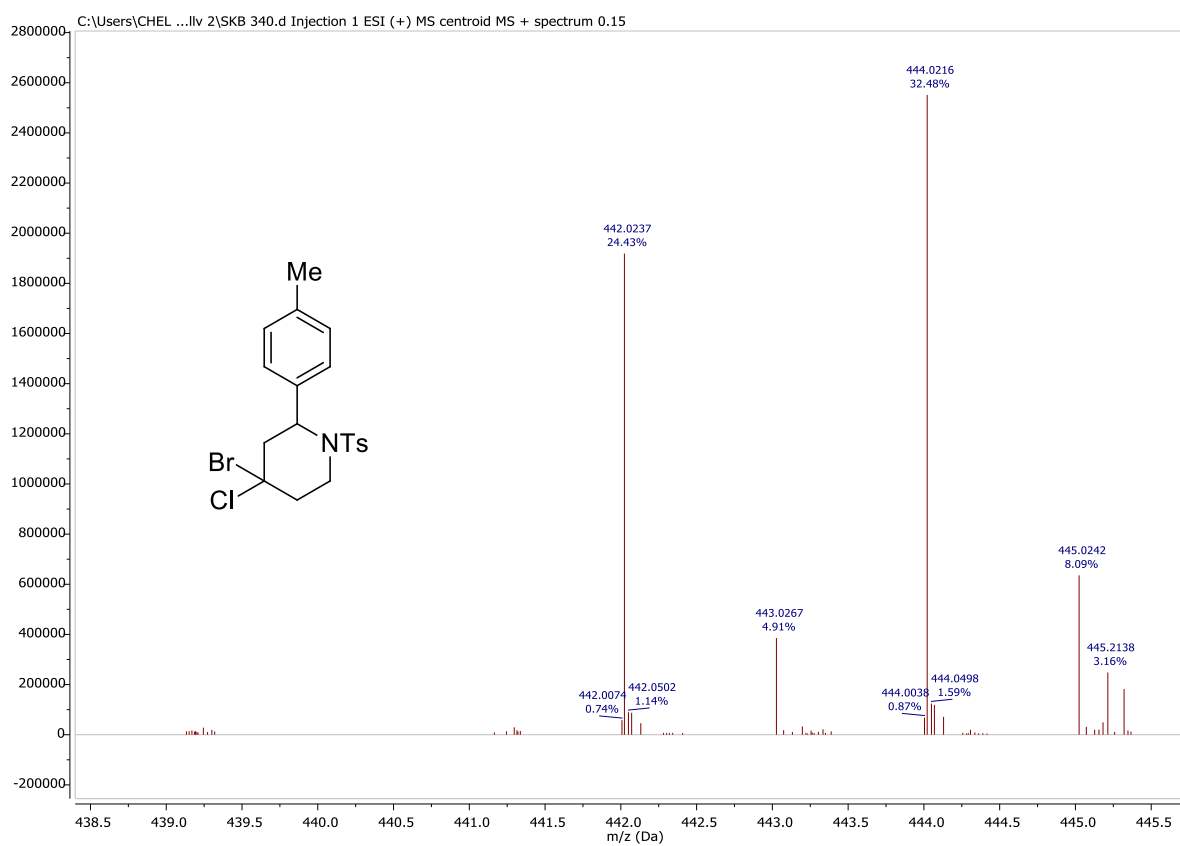

# HRMS spectrum of **3am**

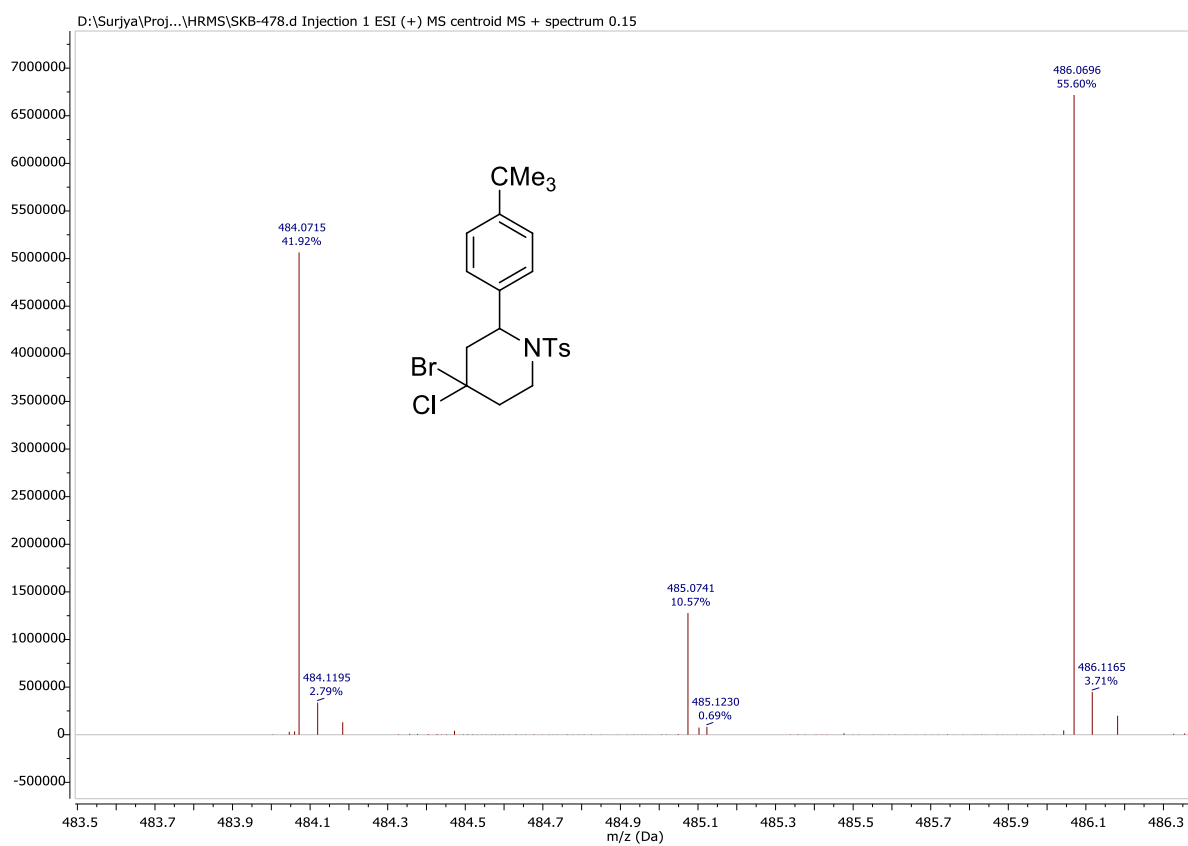

# HRMS spectrum of **3an**

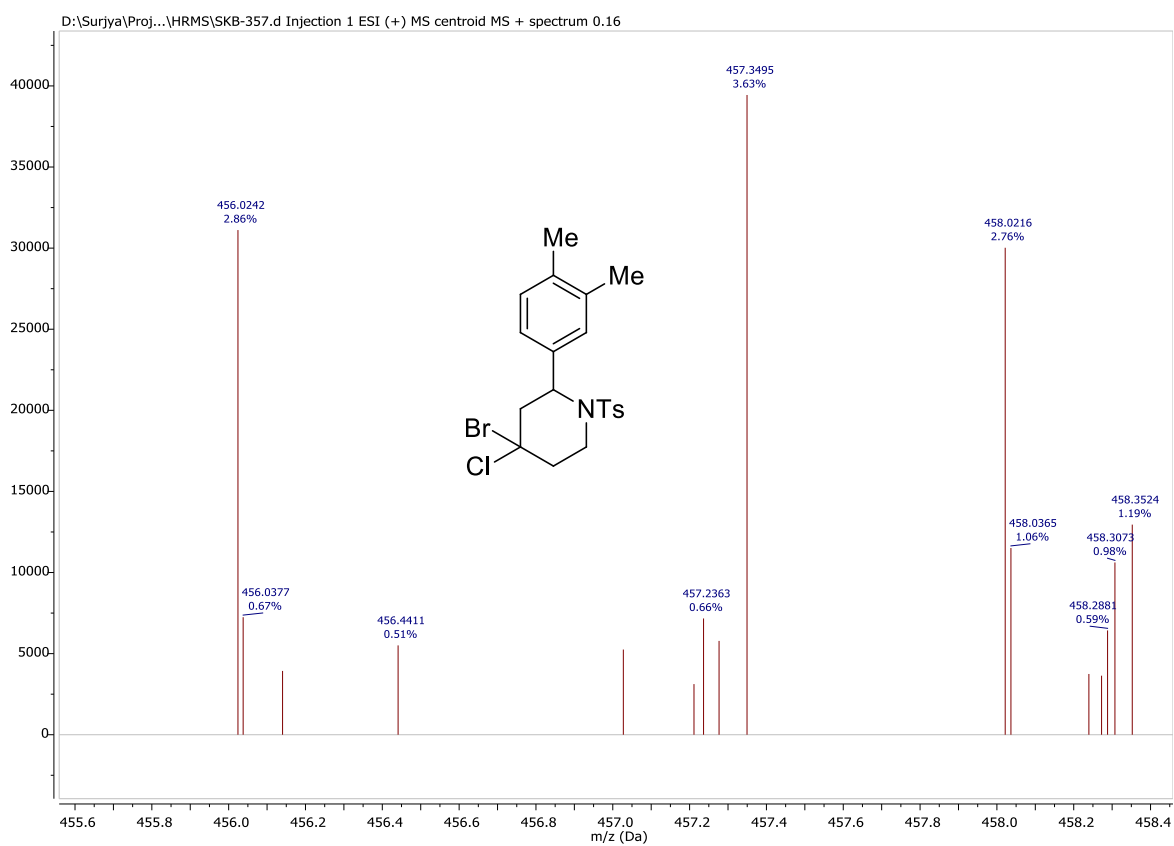



# HRMS spectrum of **3ao**

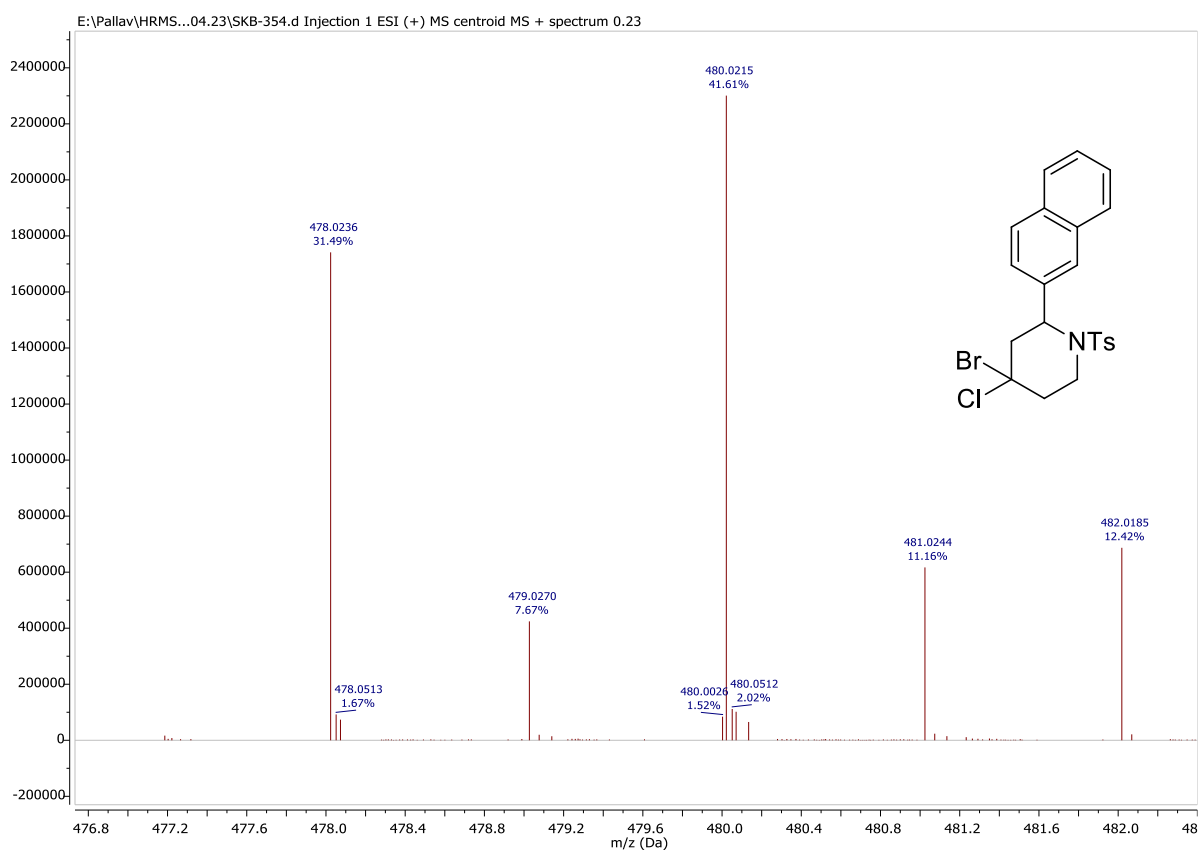

# HRMS spectrum of **3ap**

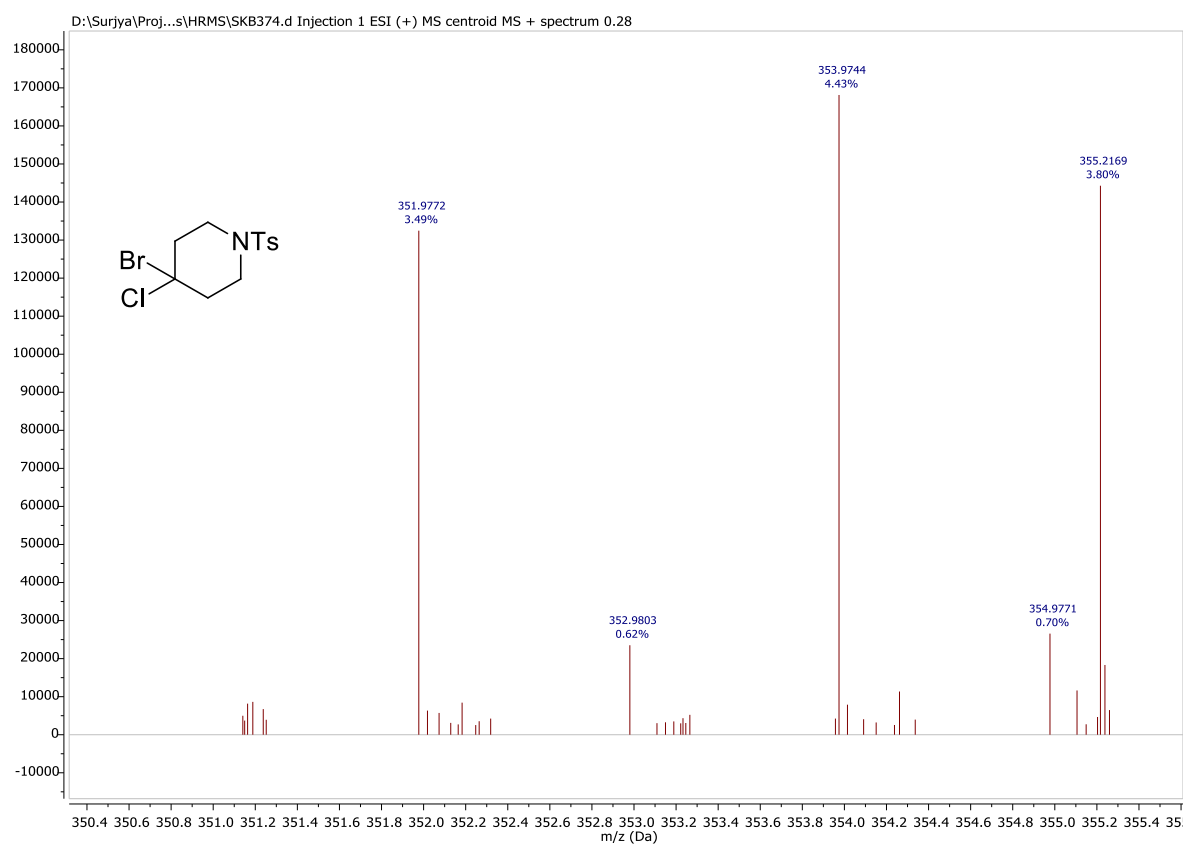

# HRMS spectrum of **3aq**

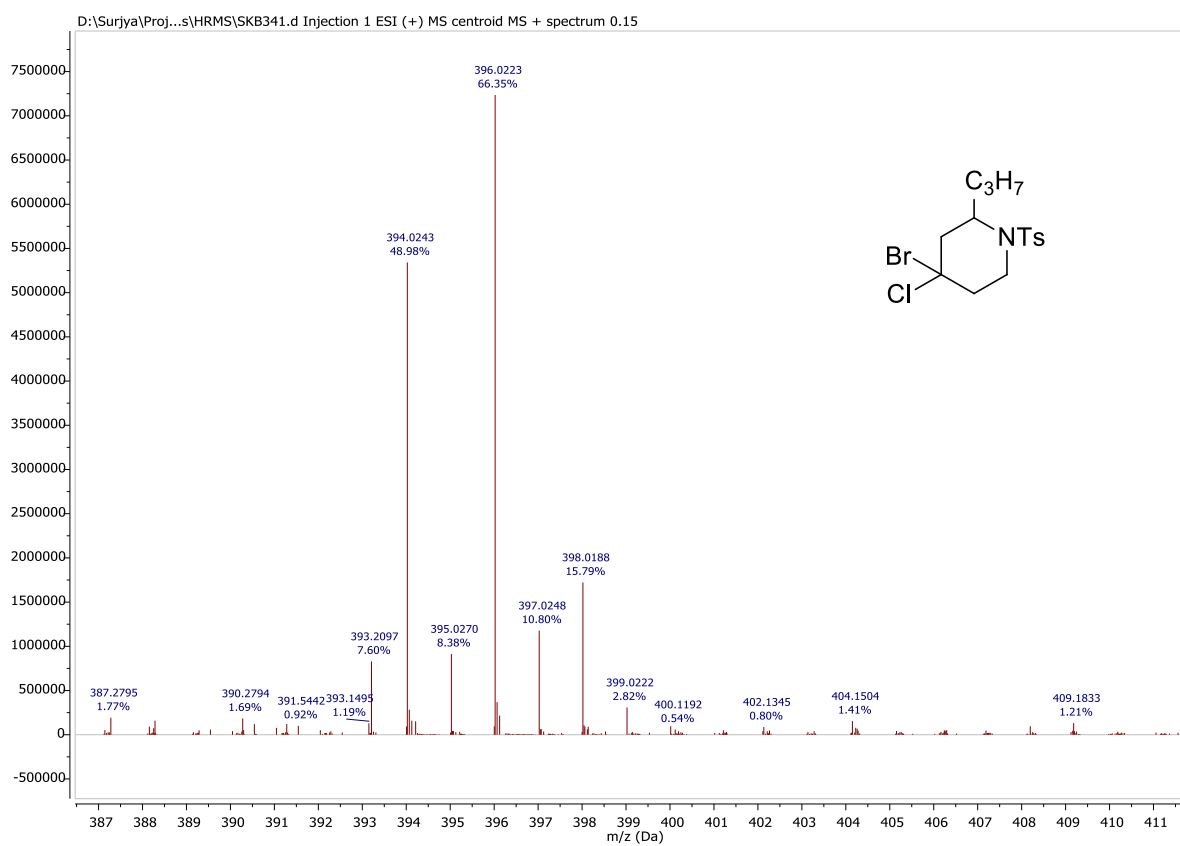

# HRMS spectrum of **3ar**

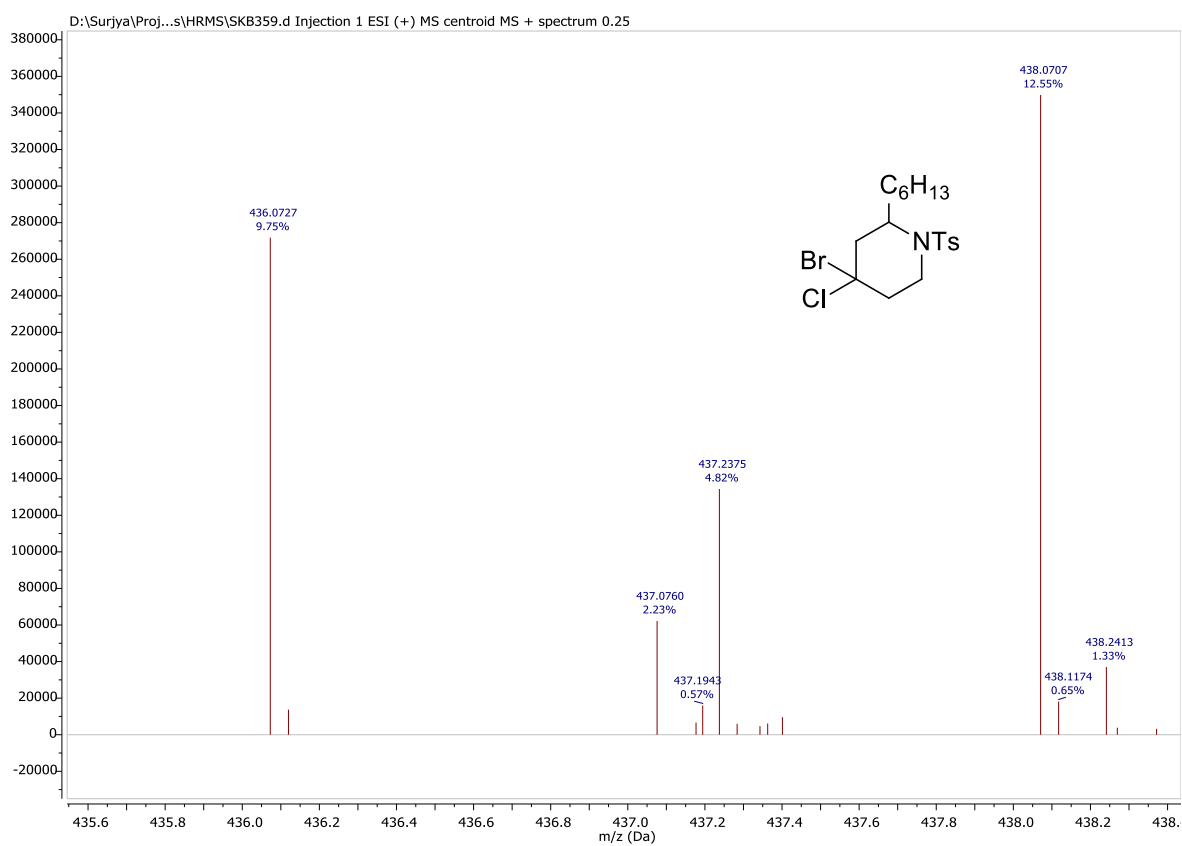

# HRMS spectrum of 3as

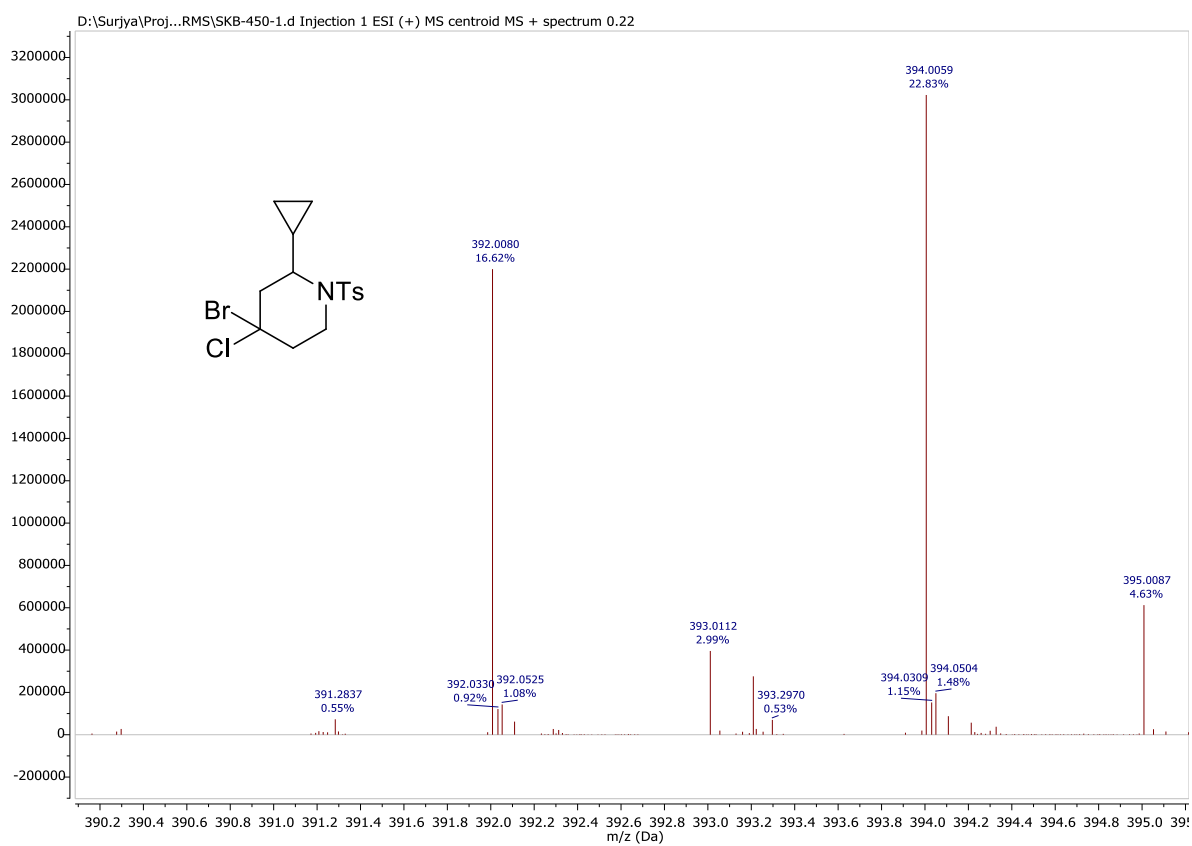

# HRMS spectrum of 3at

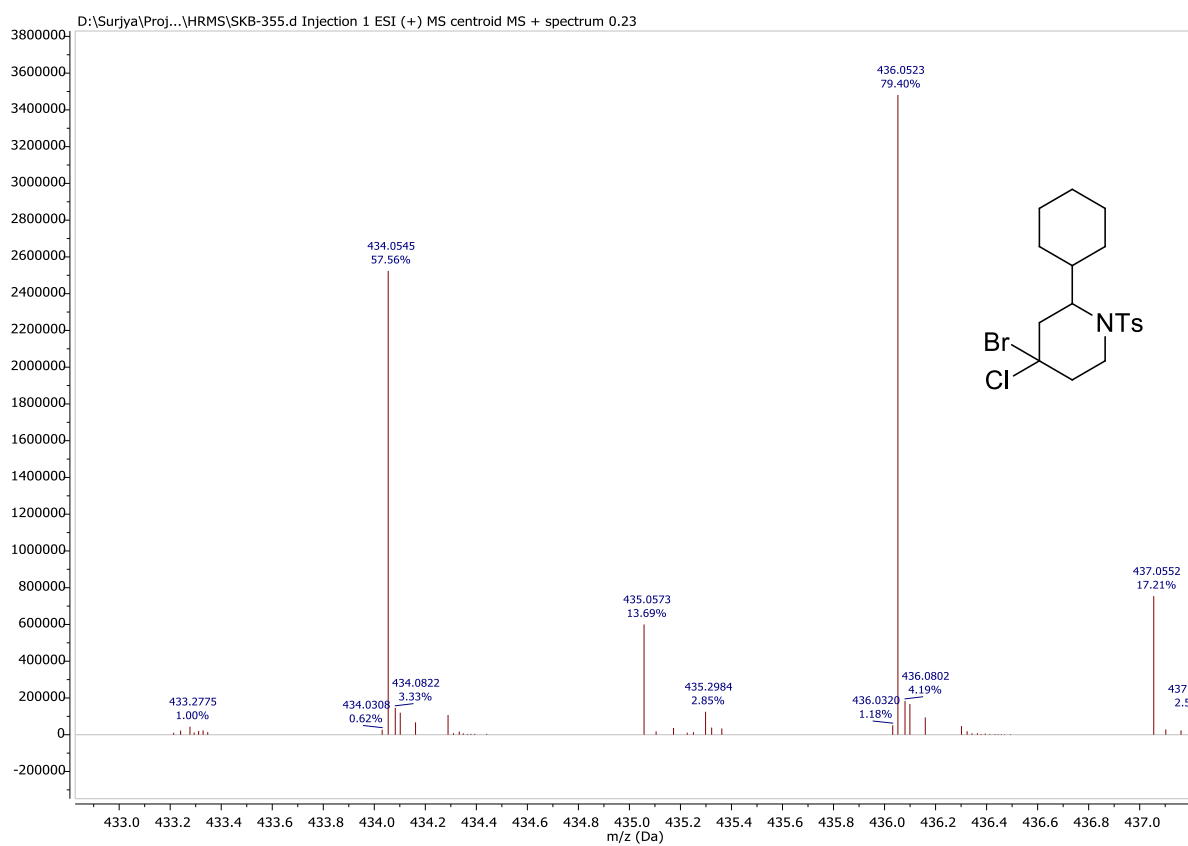

# HRMS spectrum of **3au**

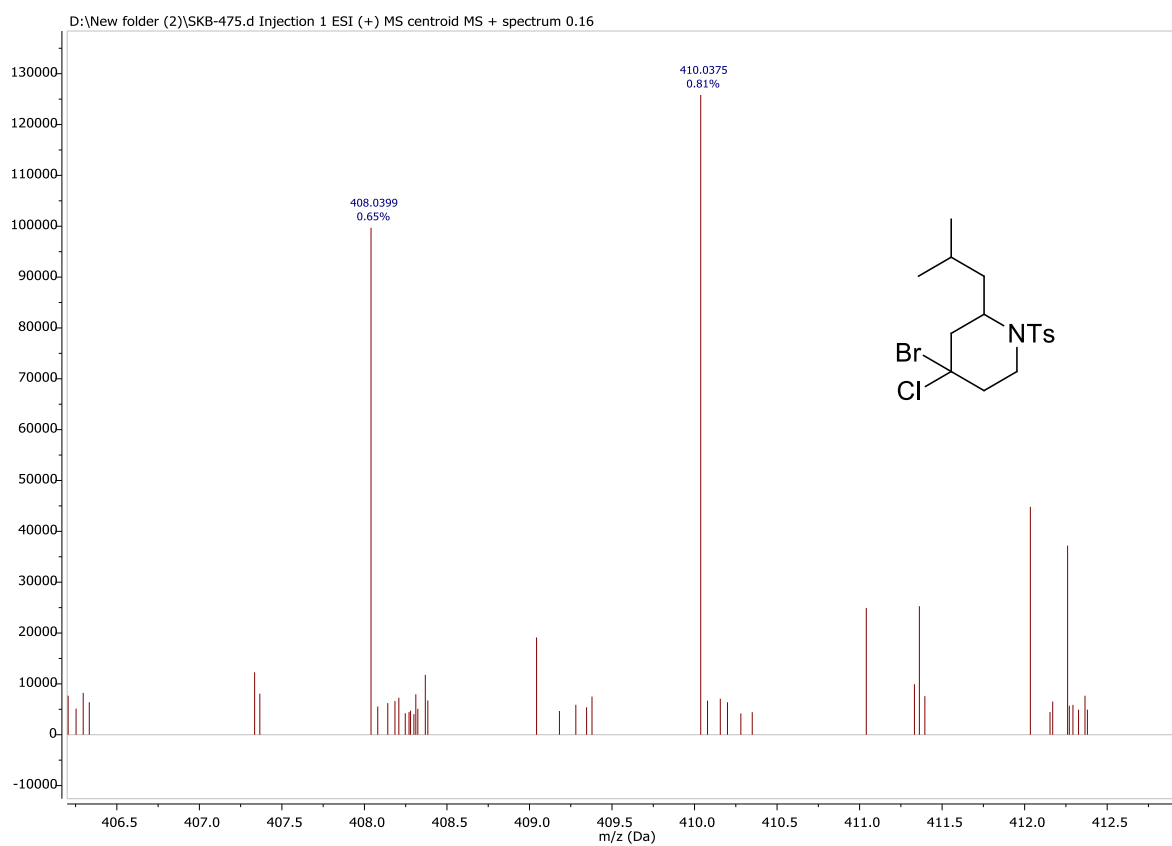

# HRMS spectrum of 3da

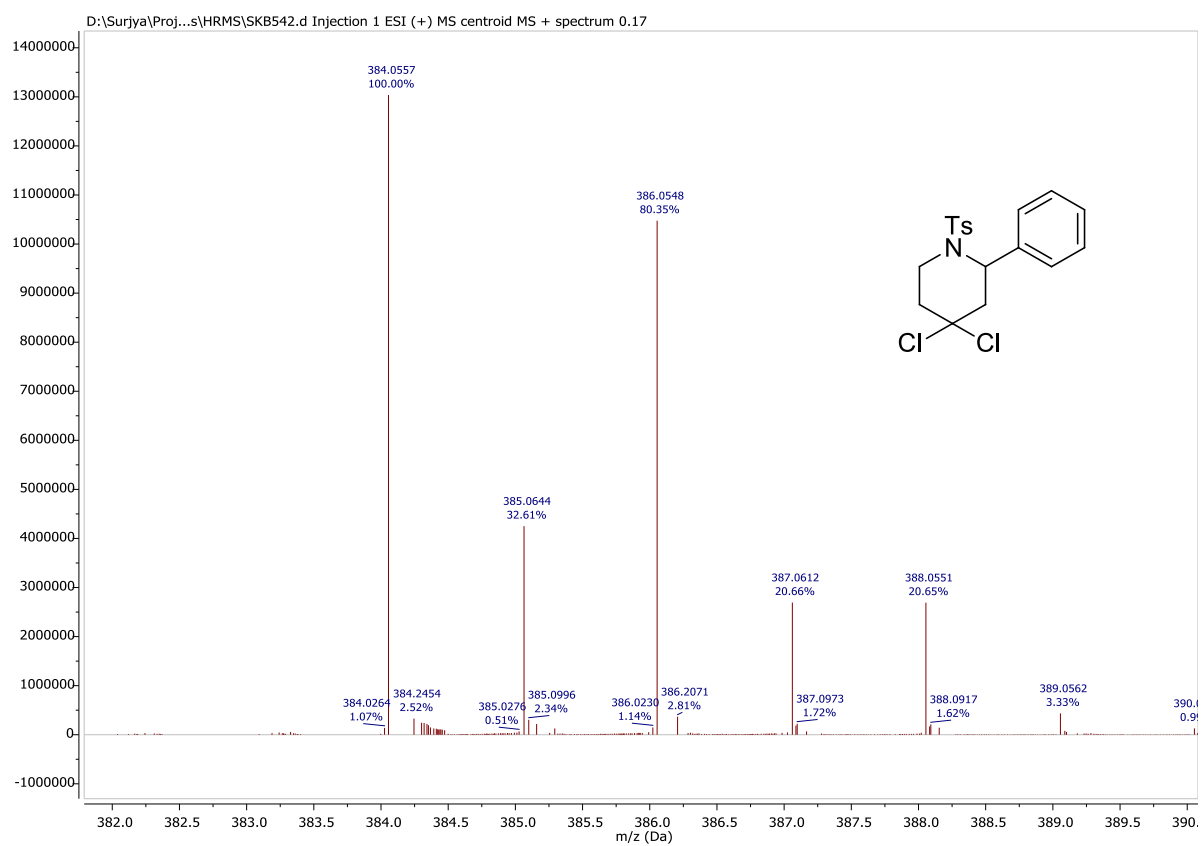



# HRMS spectrum of **3dd**

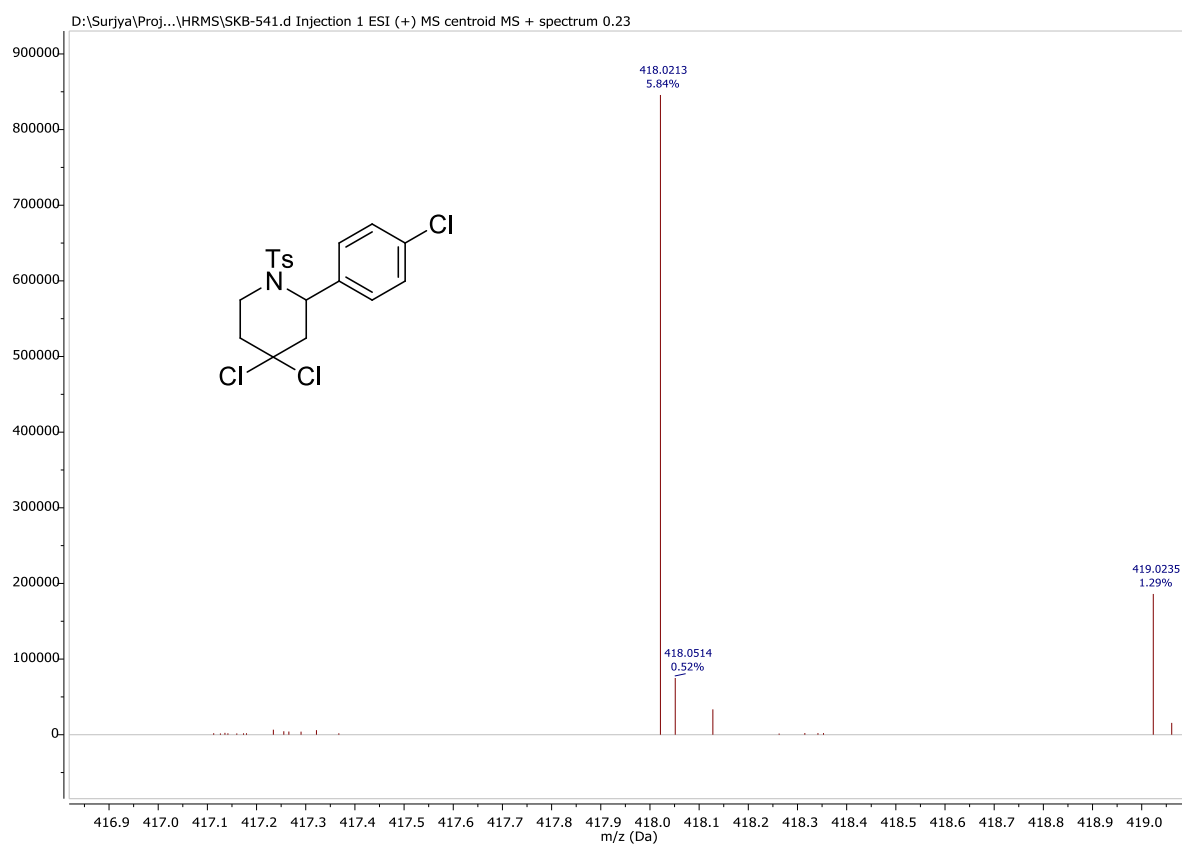

# HRMS spectrum of **3dk**

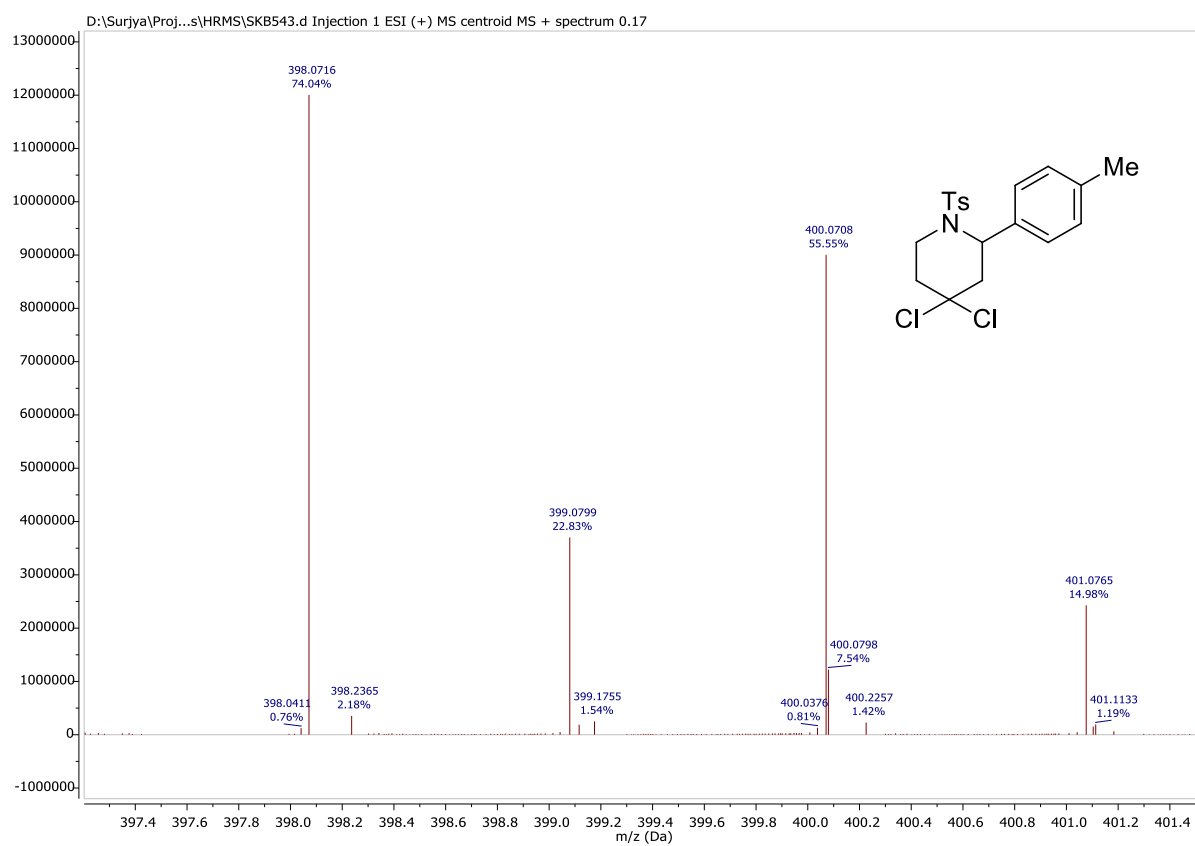

# HRMS spectrum of **3dr**

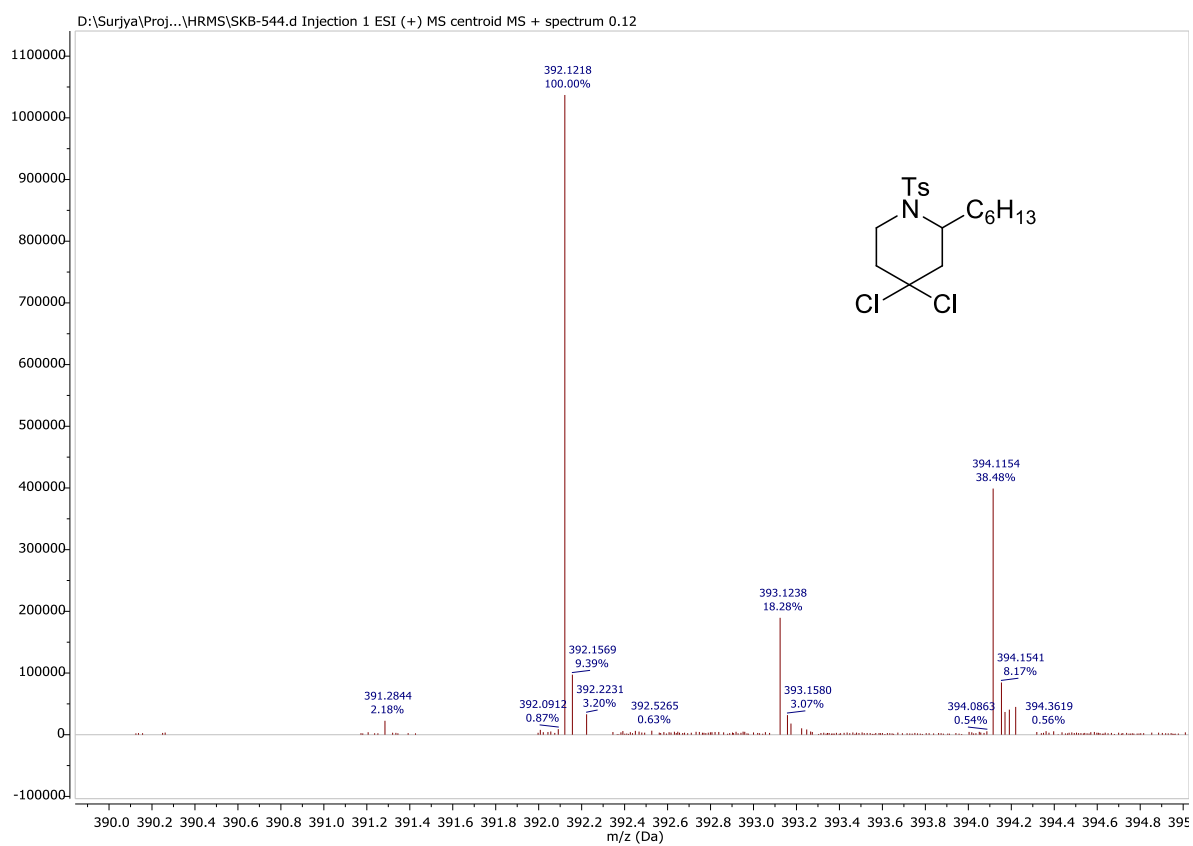

# HRMS spectrum of **3ed**

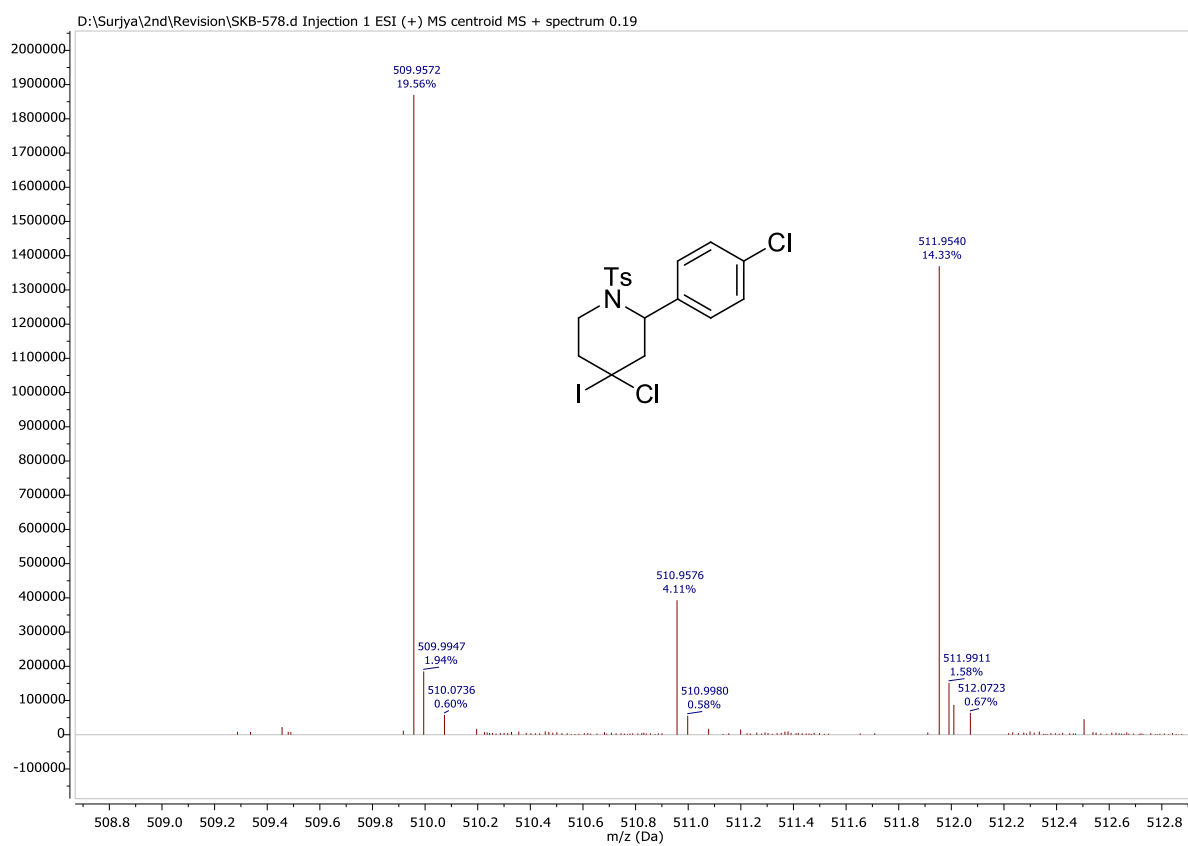

# HRMS spectrum of 4a

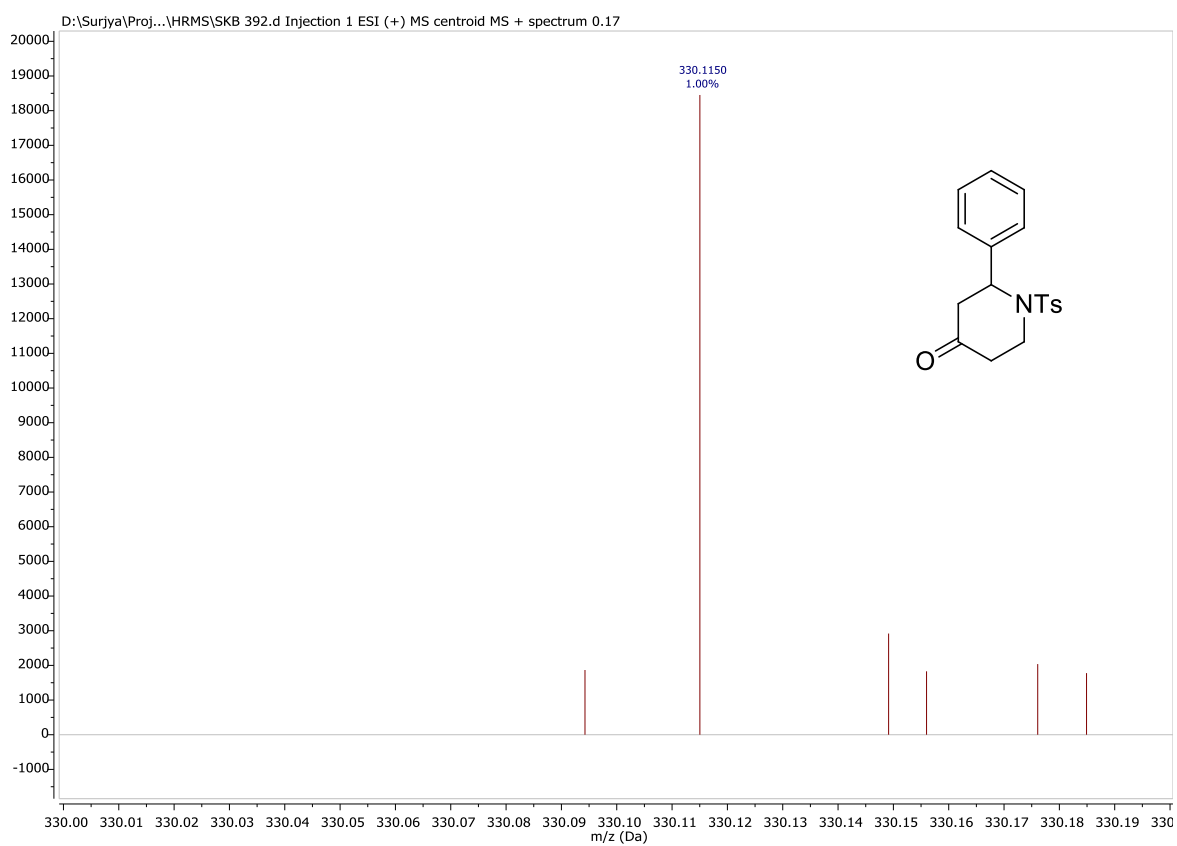

# HRMS spectrum of **4b**

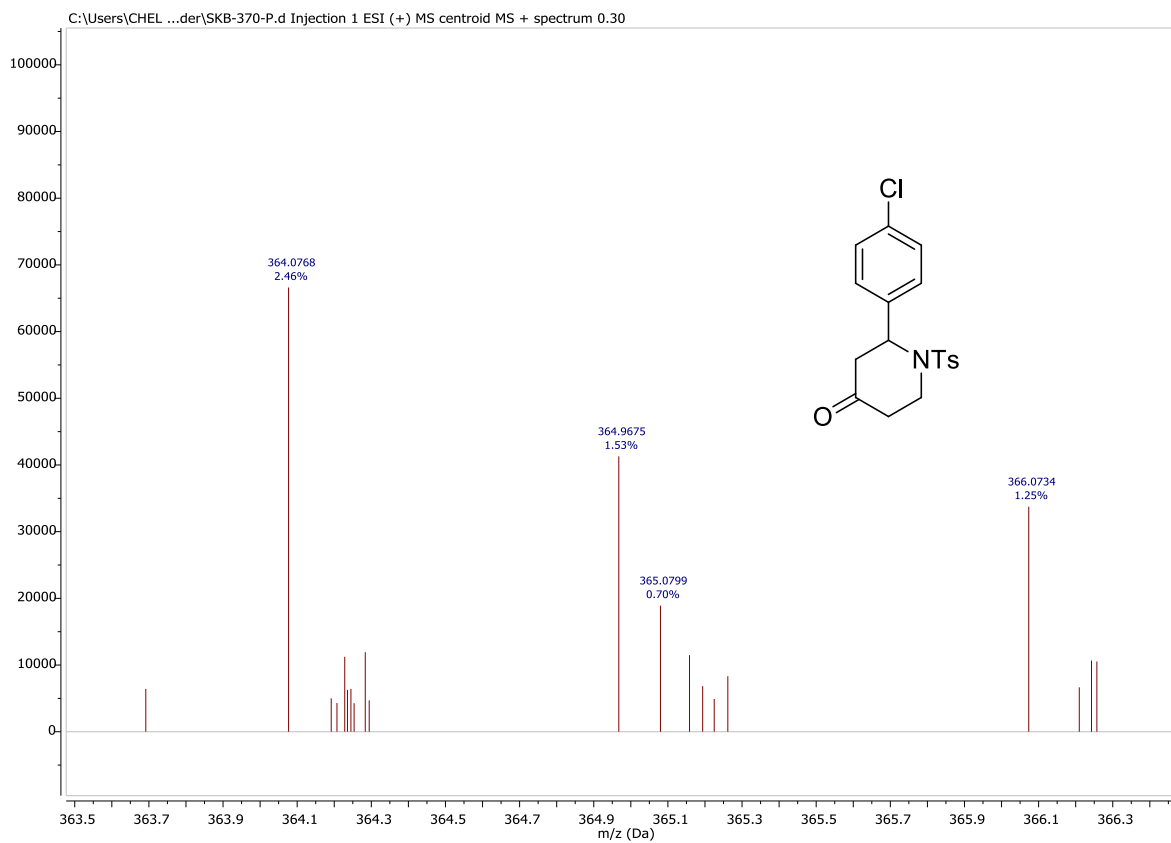

# HRMS spectrum of 4c

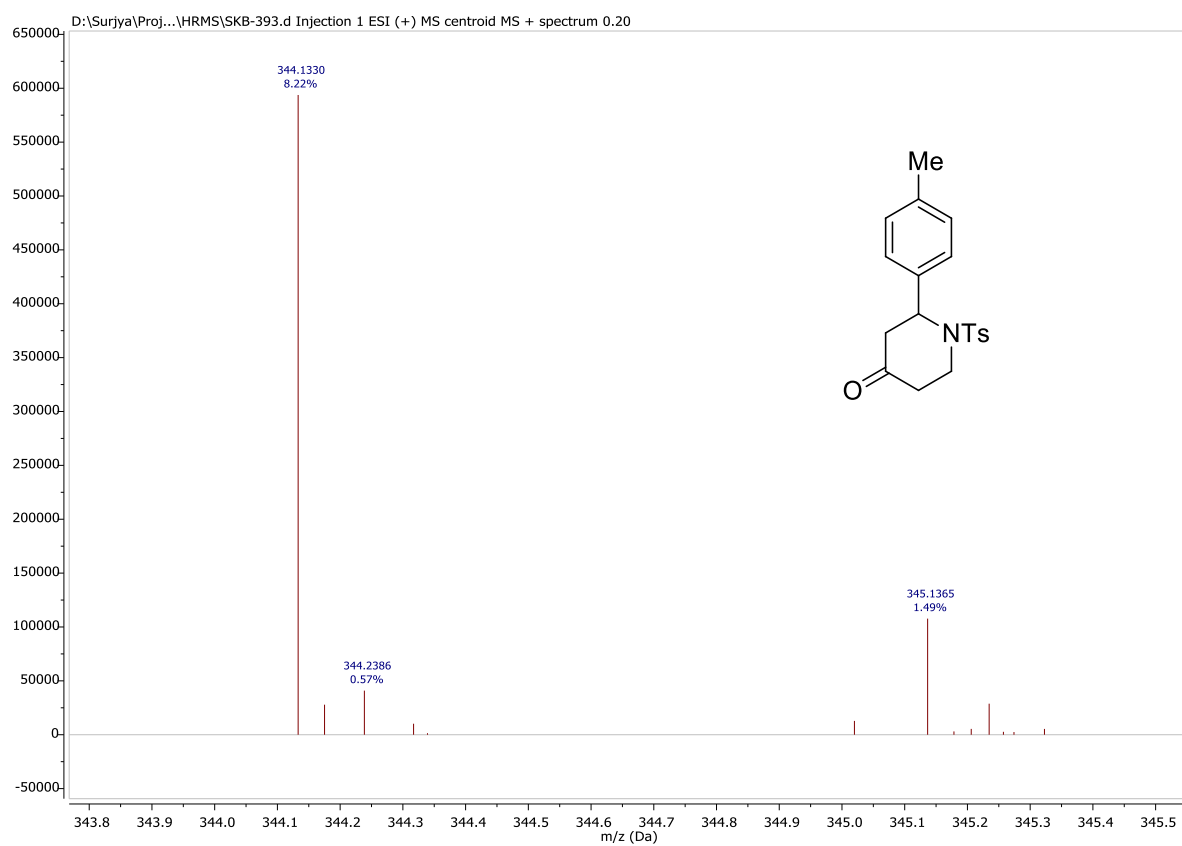

# HRMS spectrum of 4d

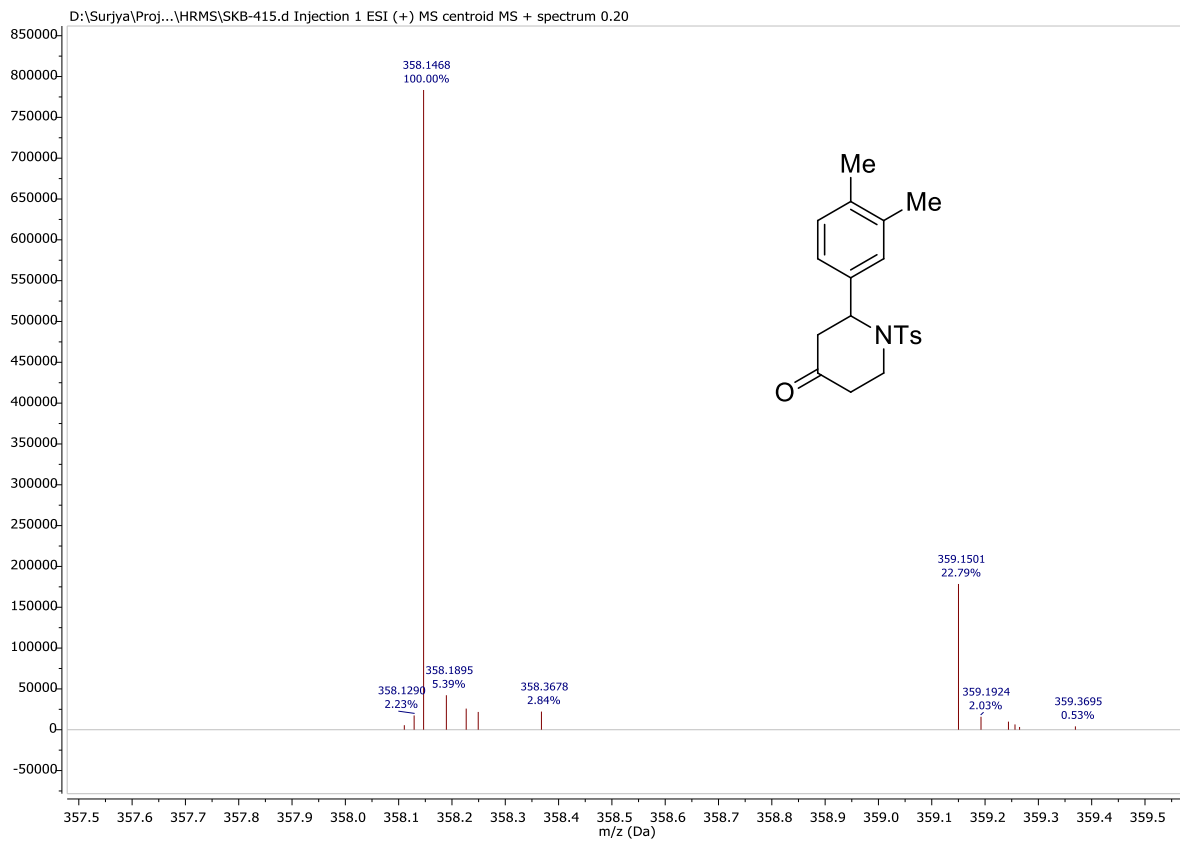



# HRMS spectrum of 4e

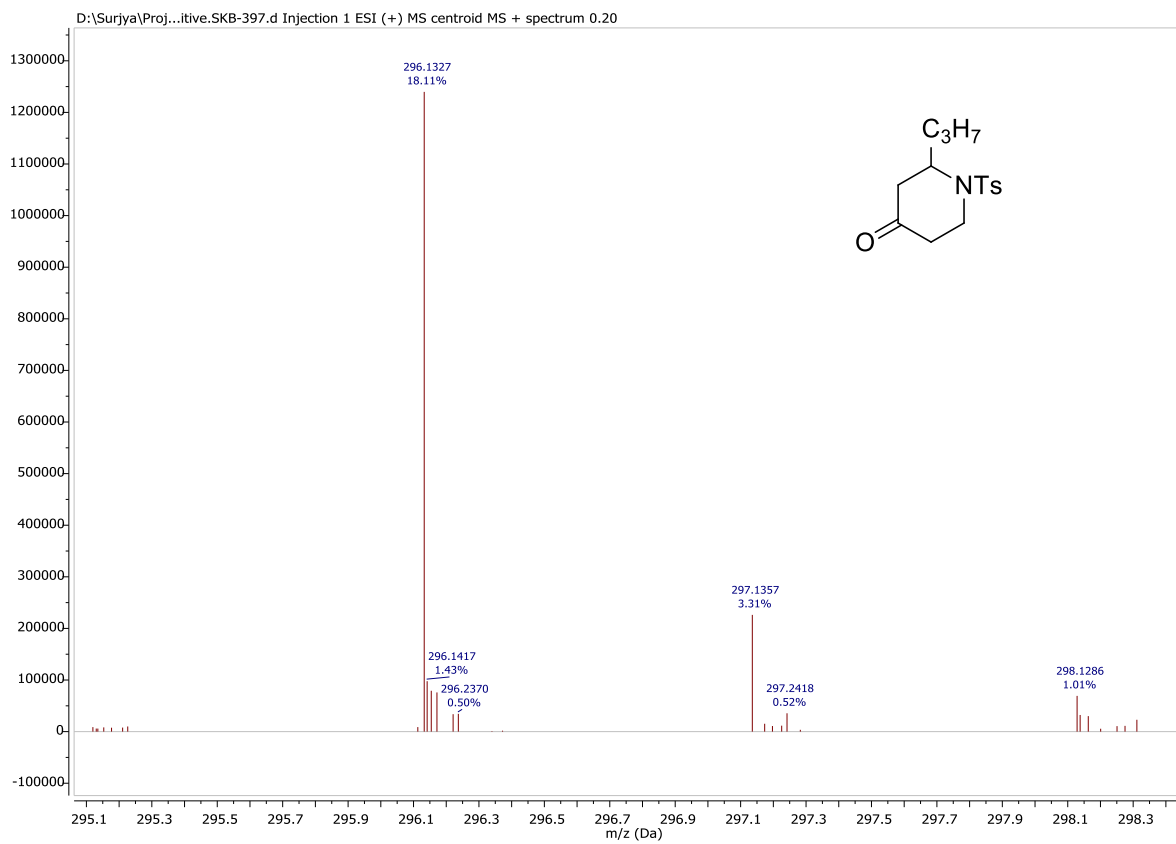

# HRMS spectrum of 4f

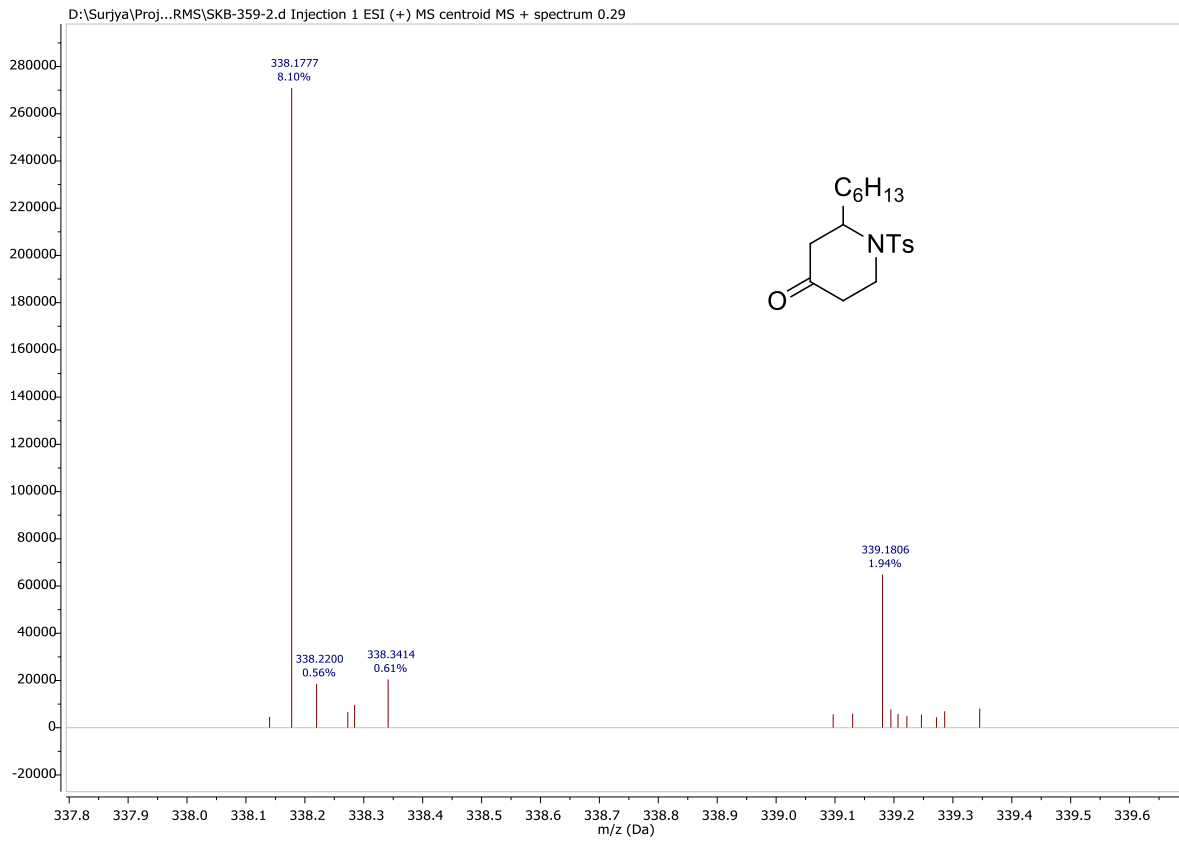

# HRMS spectrum of 4g

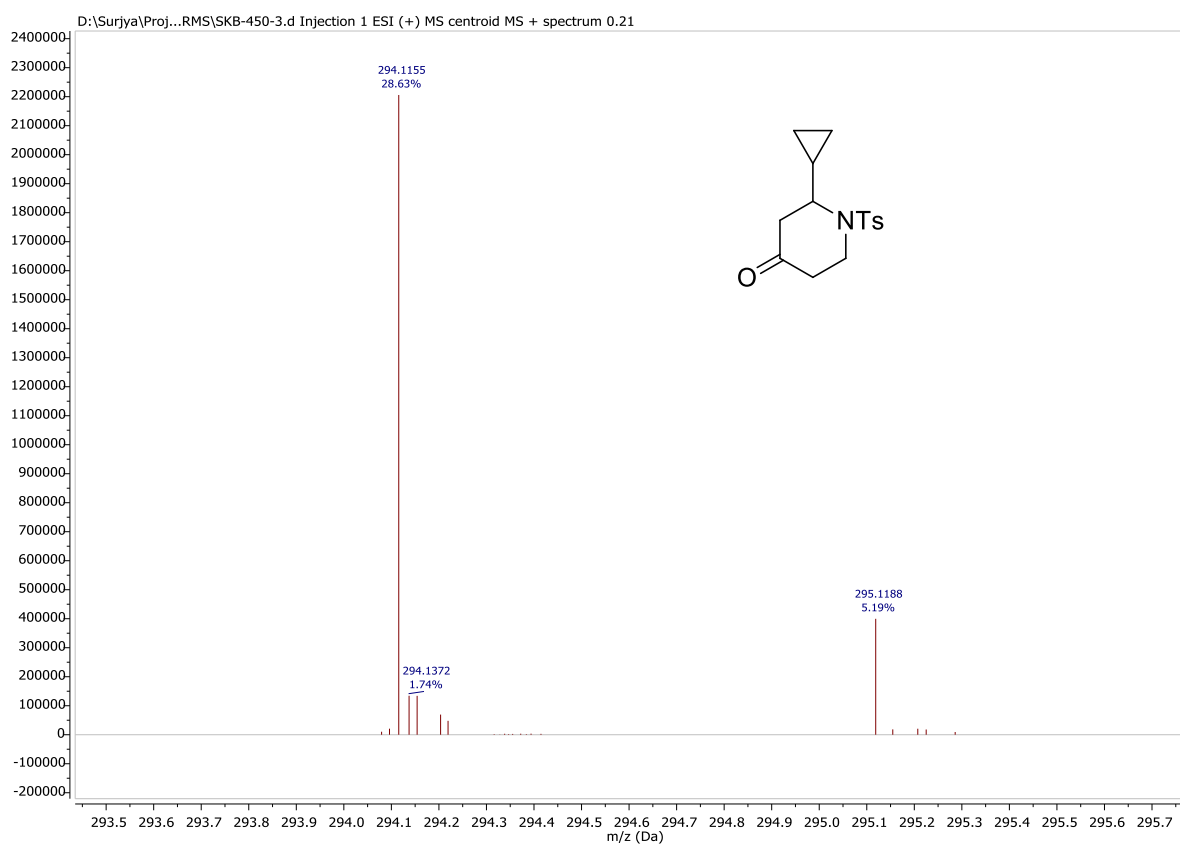

# HRMS spectrum of 4h

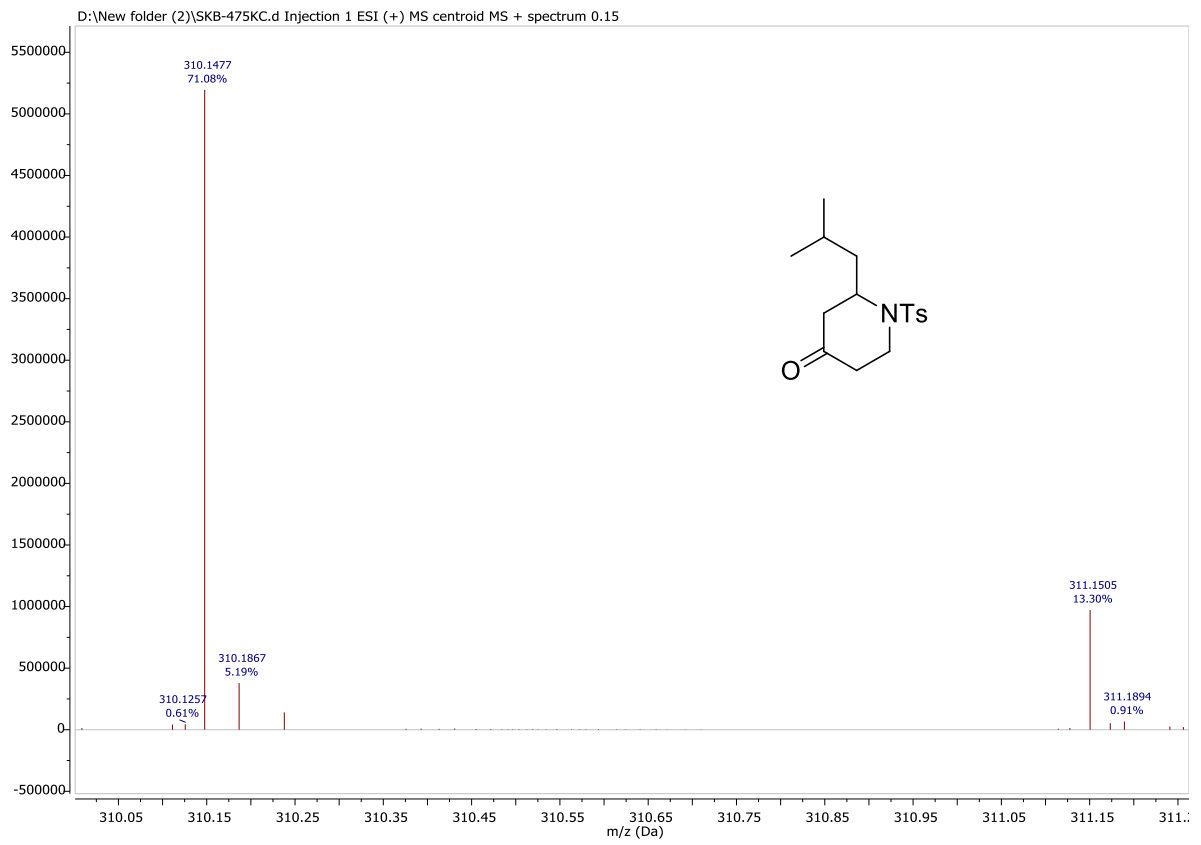

# HRMS spectrum of 5a

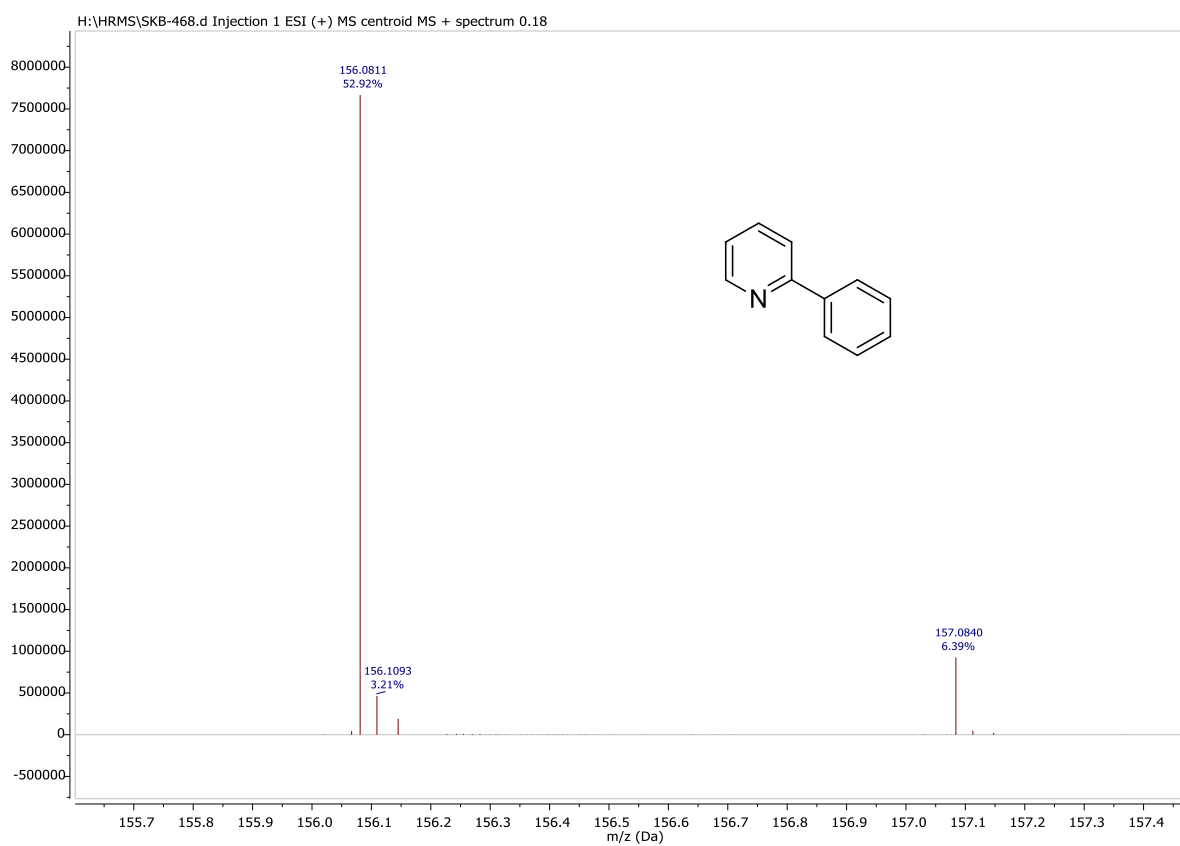

# HRMS spectrum of 5b

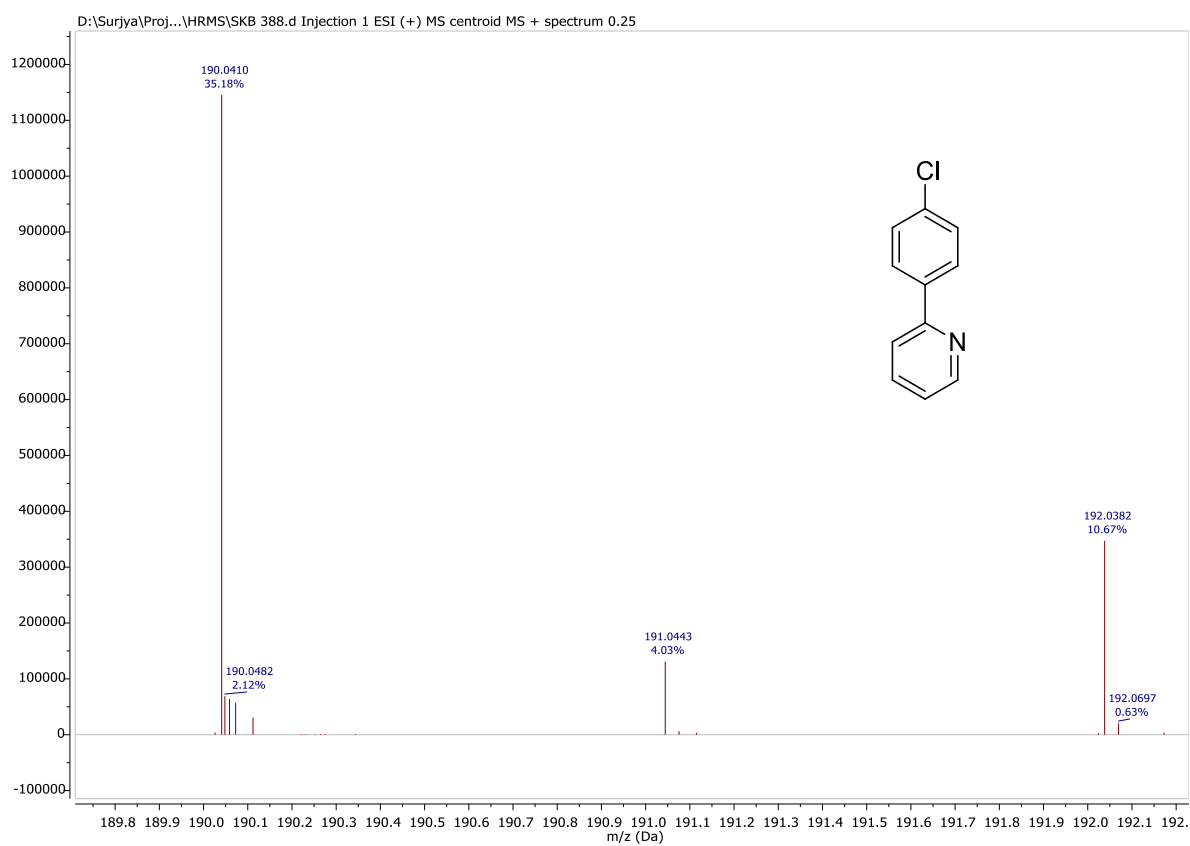

# HRMS spectrum of 5c

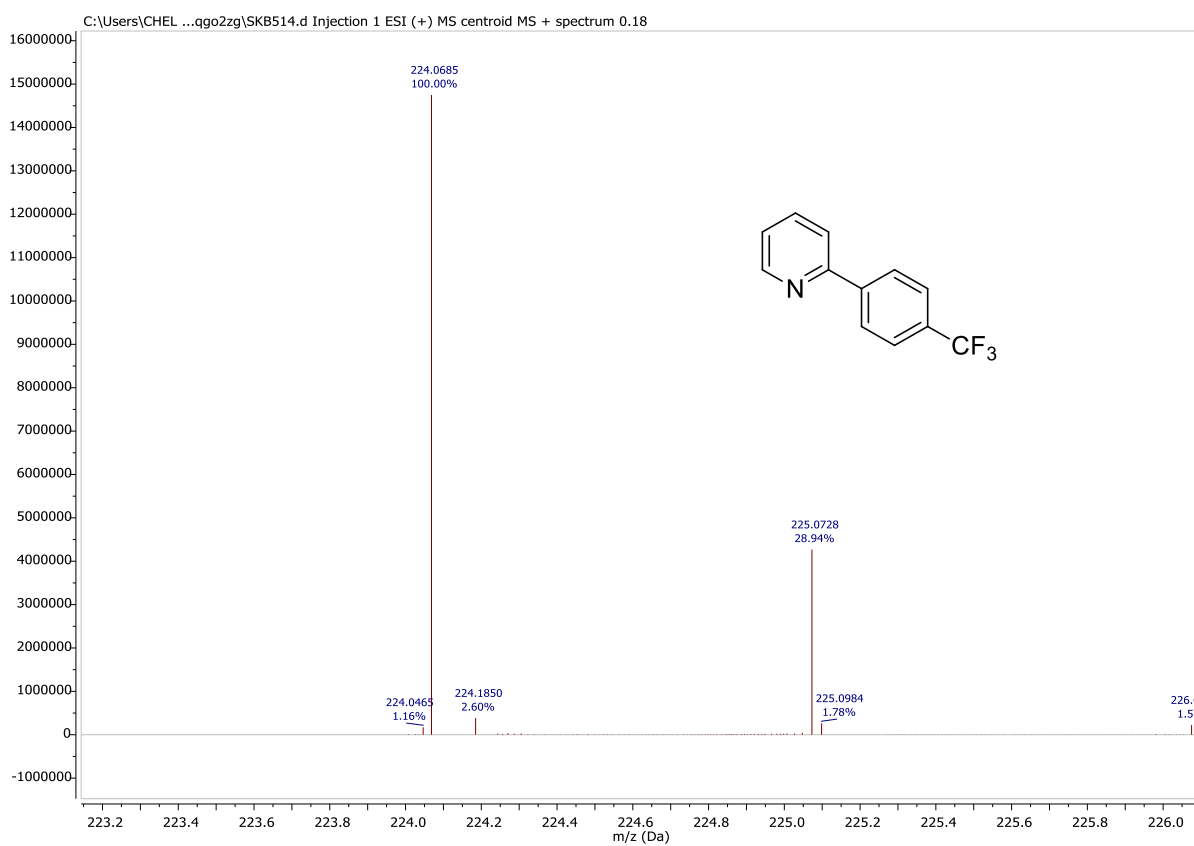

# HRMS spectrum of 5d

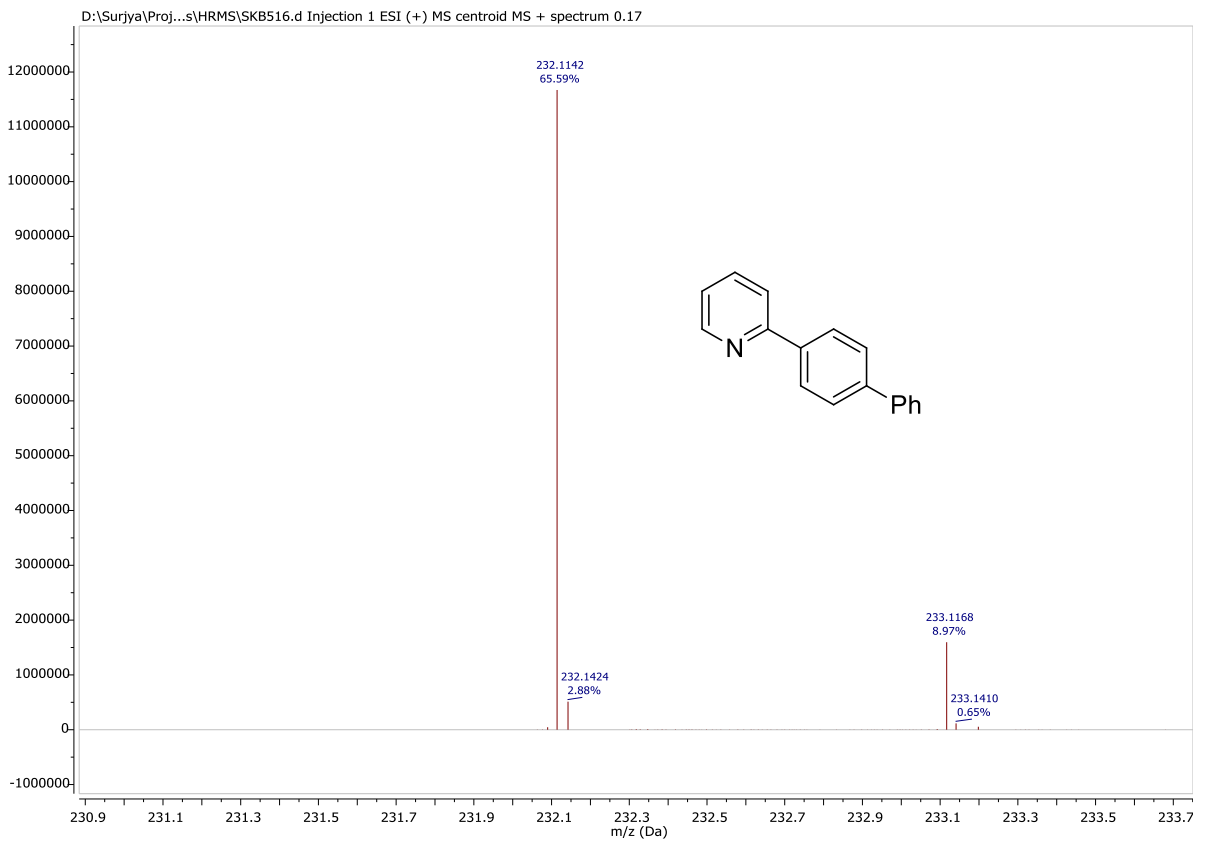



# HRMS spectrum of 5e

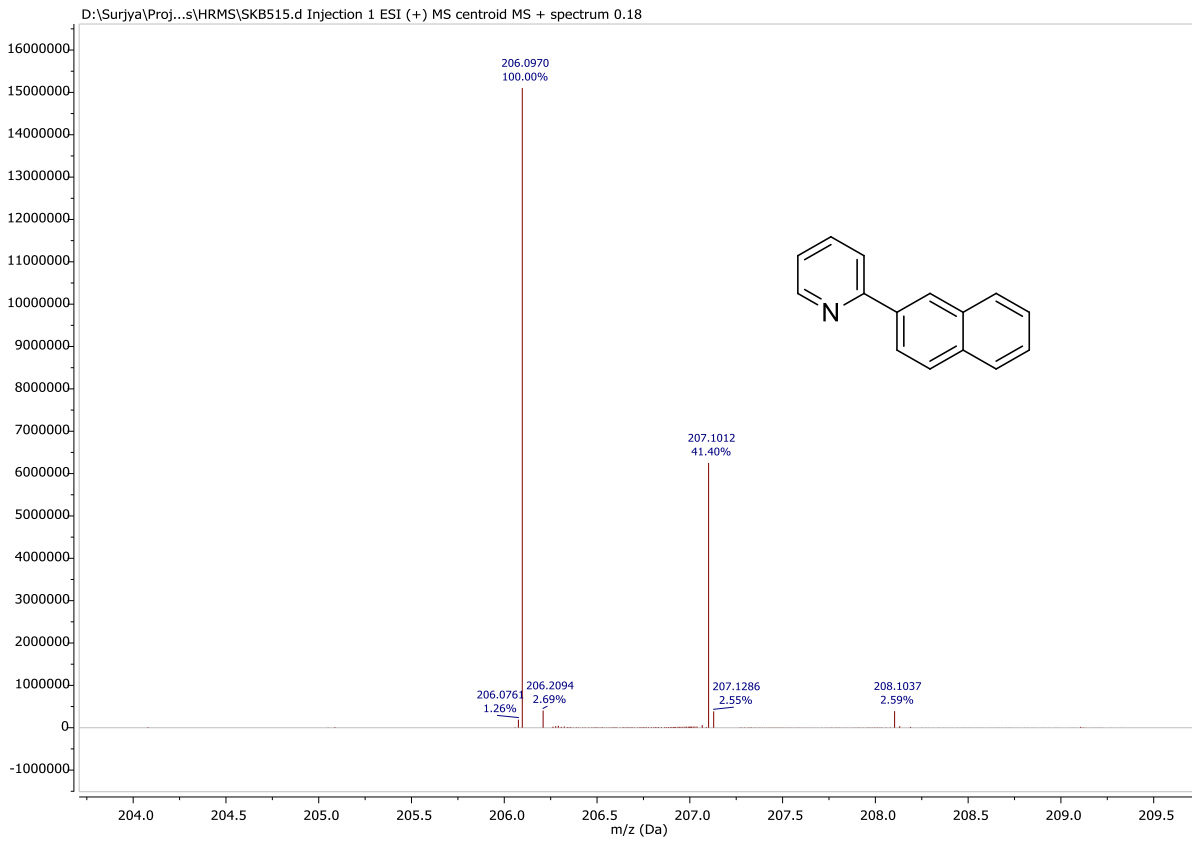

# HRMS spectrum of **5f**

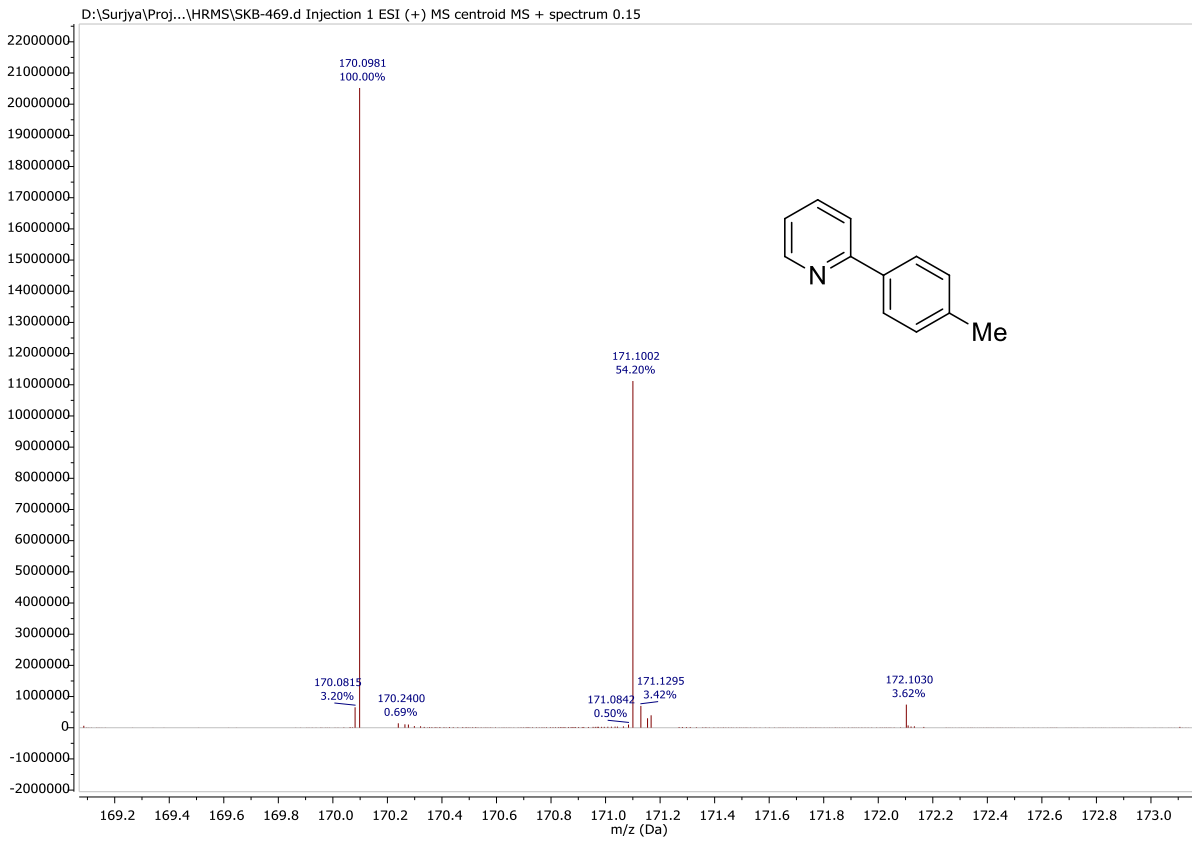

# HRMS spectrum of 6a

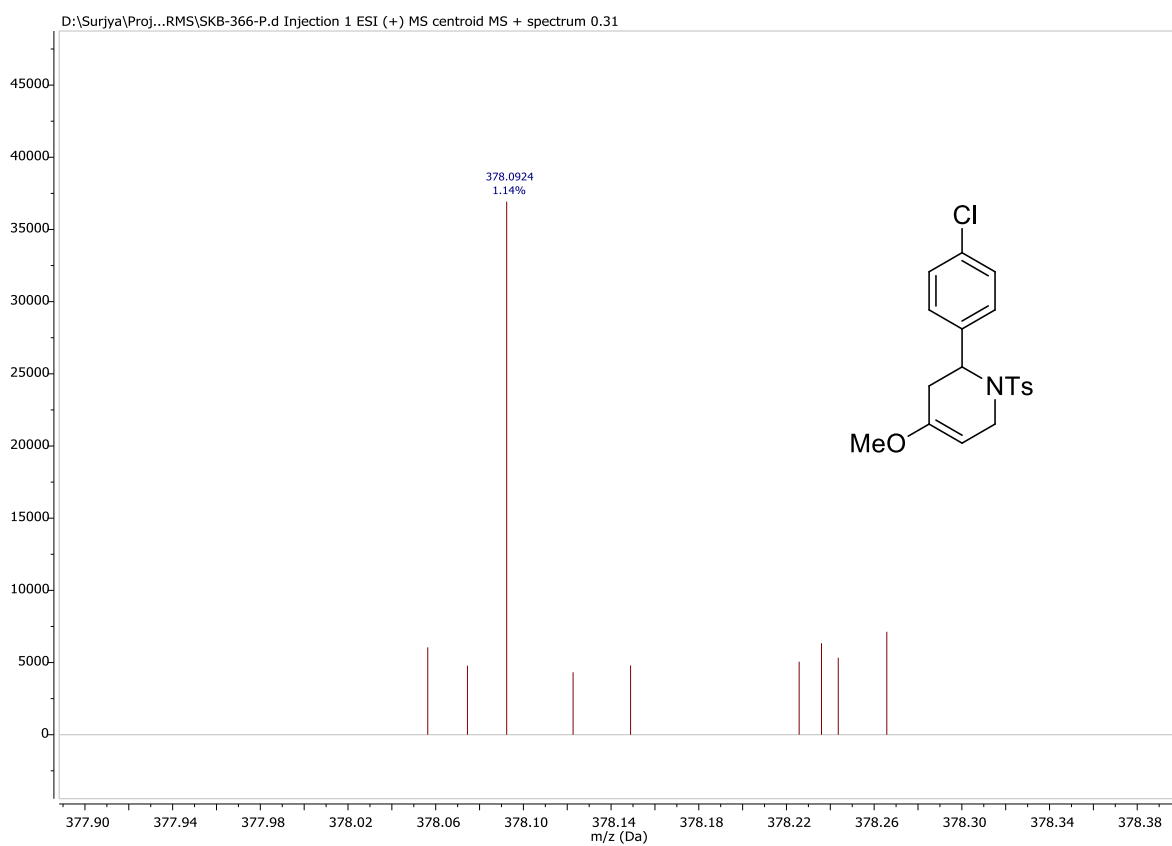

# HRMS spectrum of **6b**

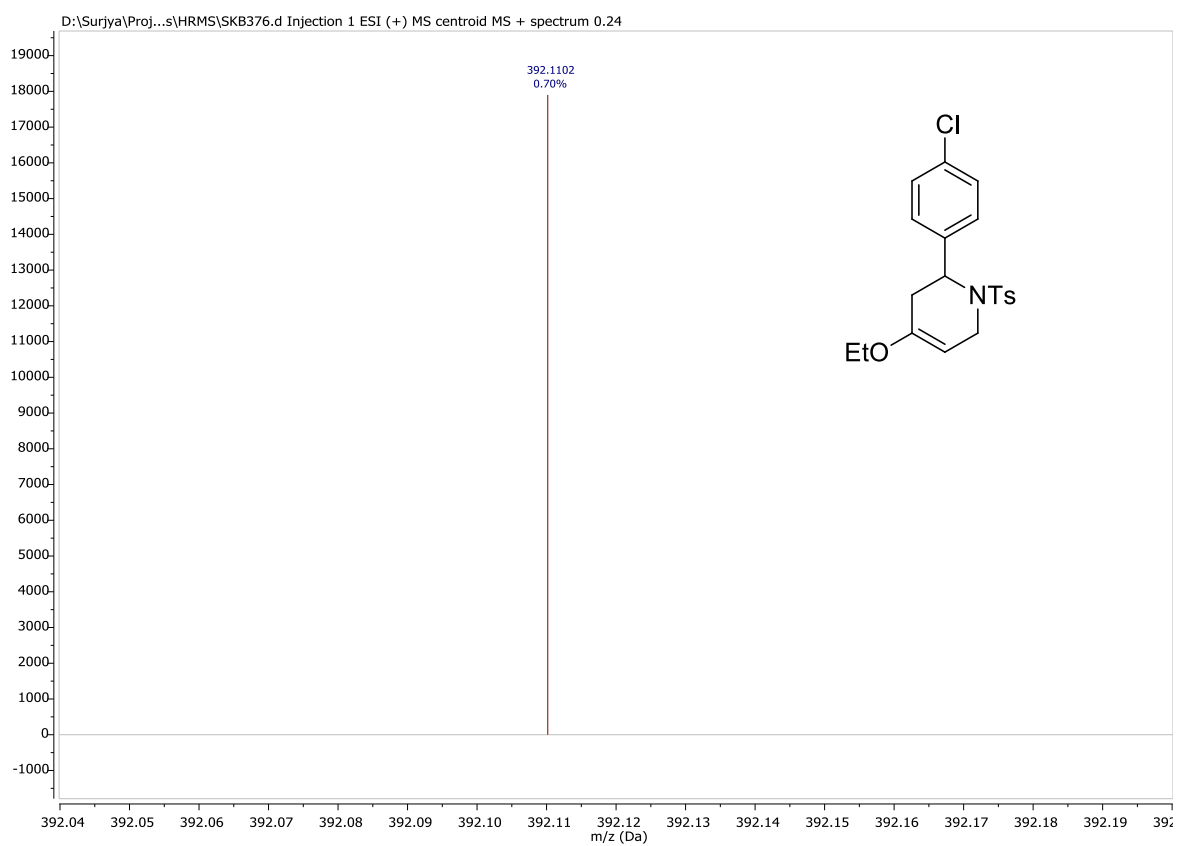

Supplement: d4ob00338a2.pdf [file d4ob00338a2.pdf]
